# Supplementary material for: Host-Associated Distribution of Two Novel Mammarenaviruses in Rodents from Southern Africa
Source: MDPI journal article supplement (doi:10.3390/v15010099), 2022-12-29
Supplement: s1 [file s1]

## Supplementary materials

### Host-associated distribution of two novel mammarenaviruses in rodents from Southern Africa

Marike Geldenhuys<sup>1</sup>, Jacqueline Weyer<sup>1,2,3</sup>, Teresa Kearney<sup>4,5</sup>, and Wanda Markotter<sup>1\*</sup>

## Supplementary figures

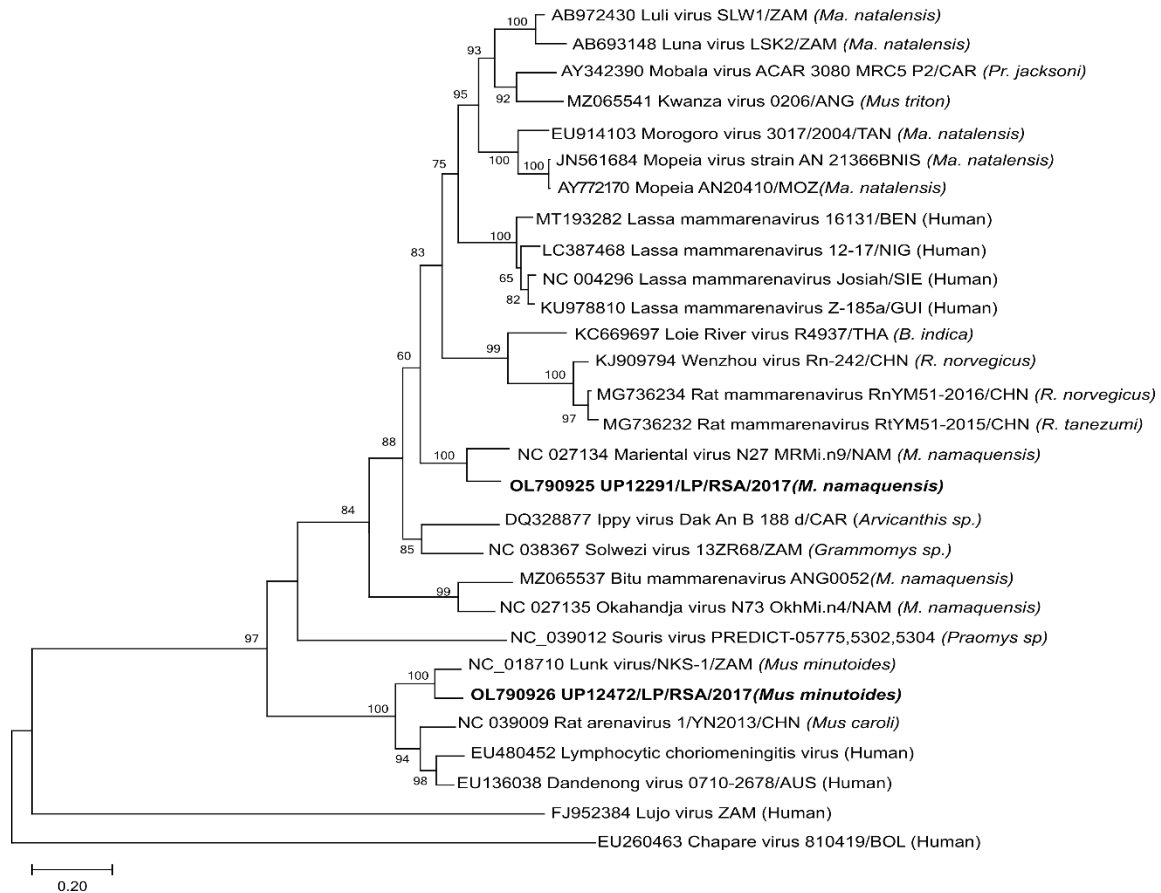

**Figure S1:** Phylogeny of a 514 amino acid region of the S segment glycoprotein gene constructed by maximum likelihood approach using the LG model with gamma distribution and 1000 bootstrap replicates in MegaX. Sequences in bold denote those reported from this study. All host species of origin are indicated, including countries from which viruses were reported as standard 3-letter country codes.

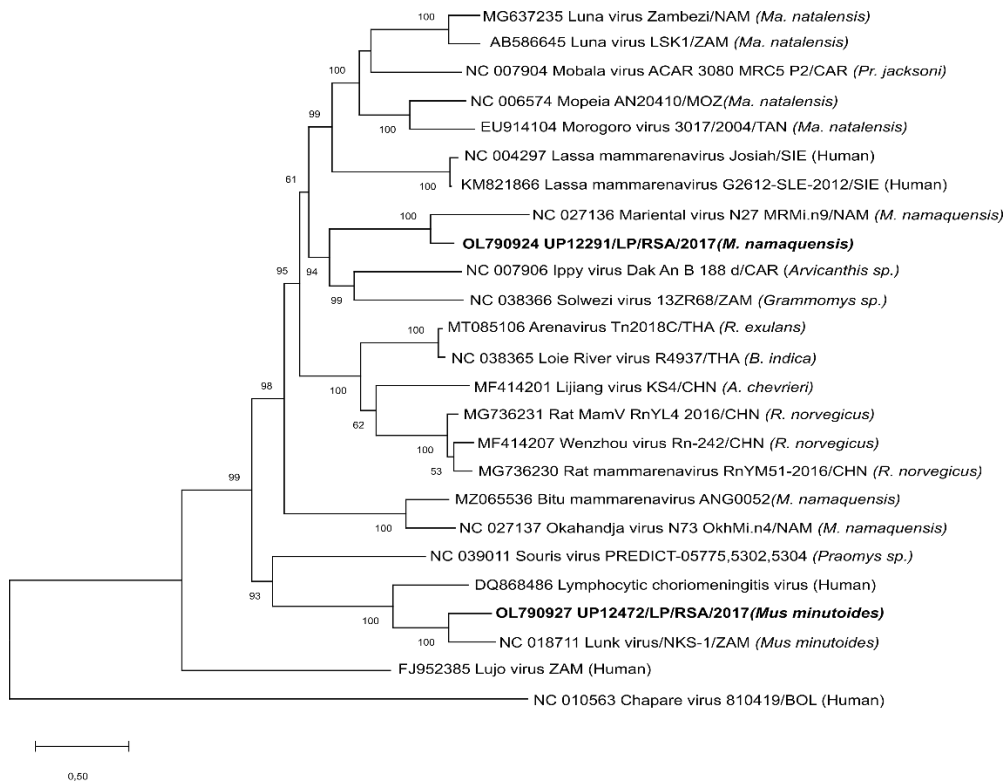

**Figure S2:** Phylogeny of the arenavirus L gene (approximately 6906 nucleotides) constructed by maximum likelihood approach using the general time reversible (GTR) model with gamma distribution and invariant sites and 1000 bootstrap replicates in MegaX. Sequences in bold denote those reported from this study. Host species of origin are indicated and countries from which viruses were reported are indicated in sequence names as standard 3-letter country codes.

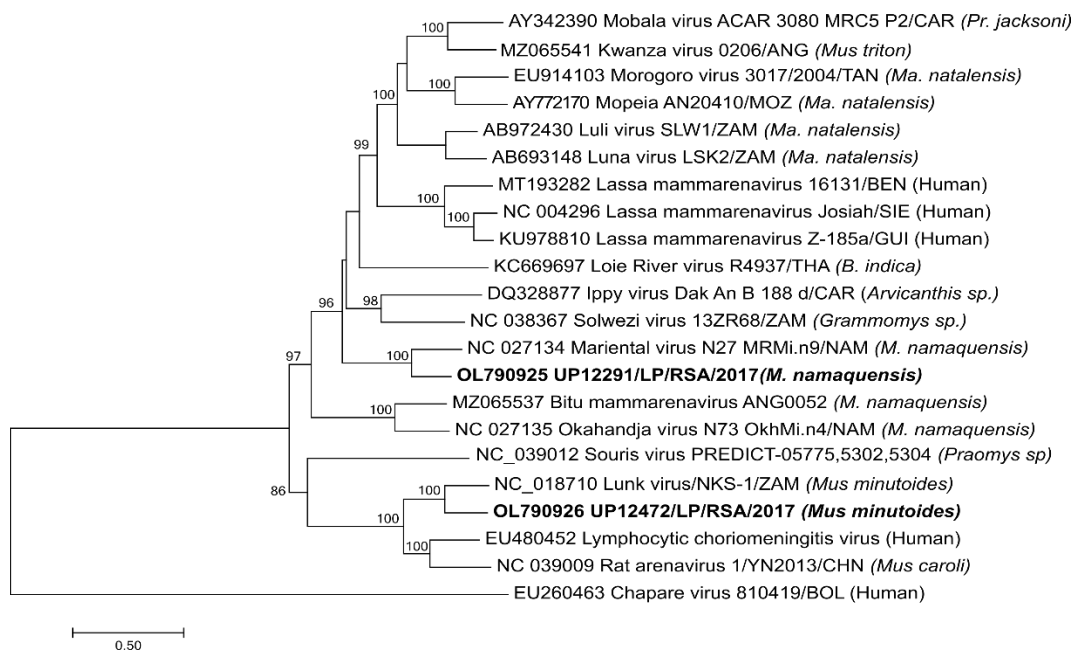

**Figure S3:** Phylogeny of the S segment (approximately 3134 nucleotides) constructed by maximum likelihood approach using the general time reversible (GTR) model with gamma distribution and invariant sites and 1000 bootstrap replicates in MegaX. Sequences in bold denote those reported from this study. Host species of origin are indicated and countries from which viruses were reported are indicated in sequence names as standard 3-letter country codes.

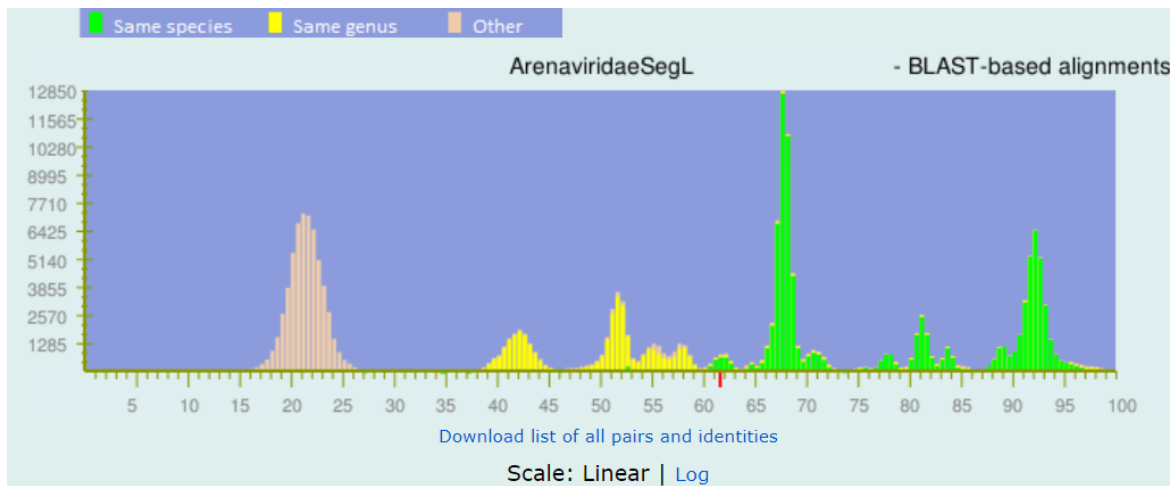

**Figure S4:** PAirwise Sequence Comparison (PASC) program output of UP12291/M. namaquensis/LP/RSA/2017 L segment from NCBI, with closest relative Mariental virus N27 MRMi.n9.

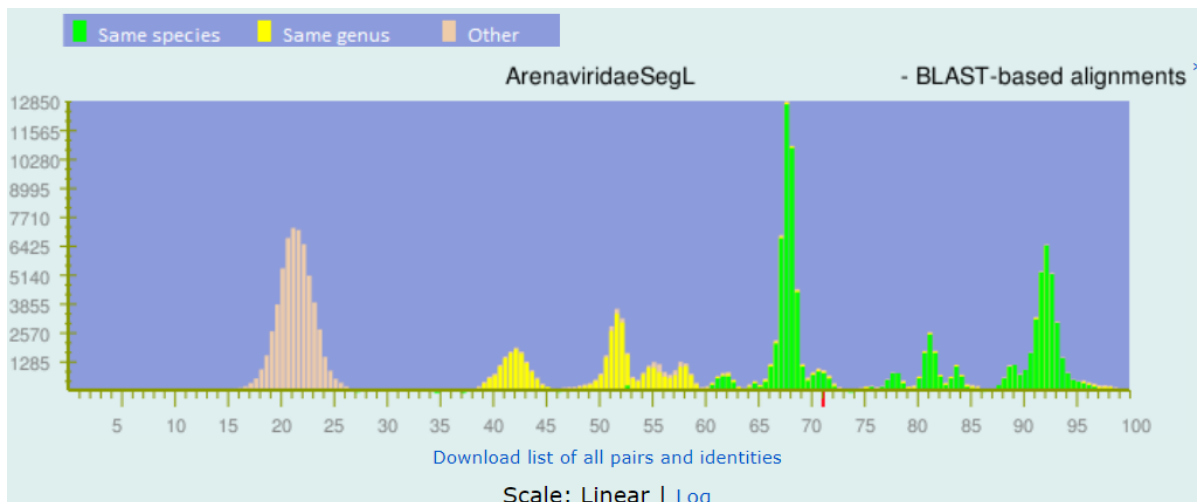

**Figure S5:** PAirwise Sequence Comparison (PASC) program output of UP12472/M. minutoides/LP/RSA/2017 L segment from NCBI, with closest relative Lunk mammarenavirus.

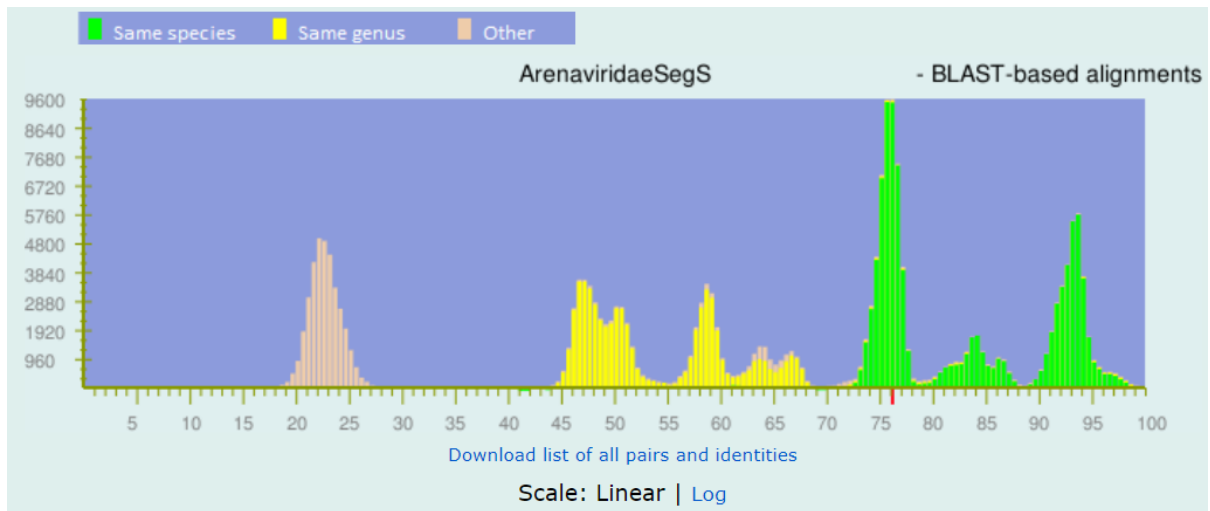

**Figure S6:** PAirwise Sequence Comparison (PASC) program output of UP12291/M. namaquensis/LP/RSA/2017 S segment from NCBI, with closest relative Mariental virus N27 MRMi.n9.

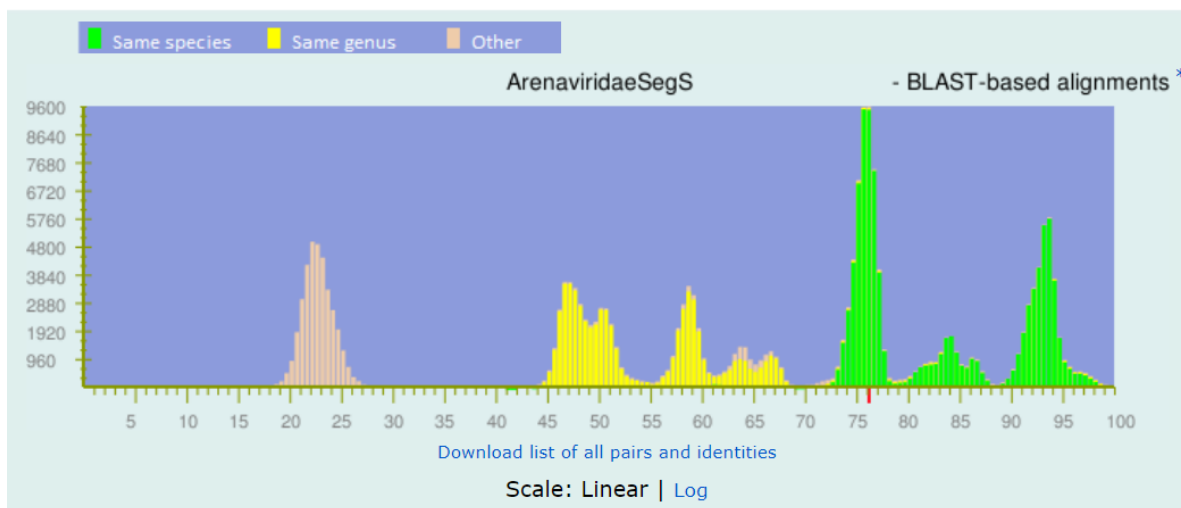

**Figure S7:** PAirwise Sequence Comparison (PASC) program output of UP12472/M. minutoides/LP/RSA/2017 S segment from NCBI, with closest relative Lunk mammarenavirus.

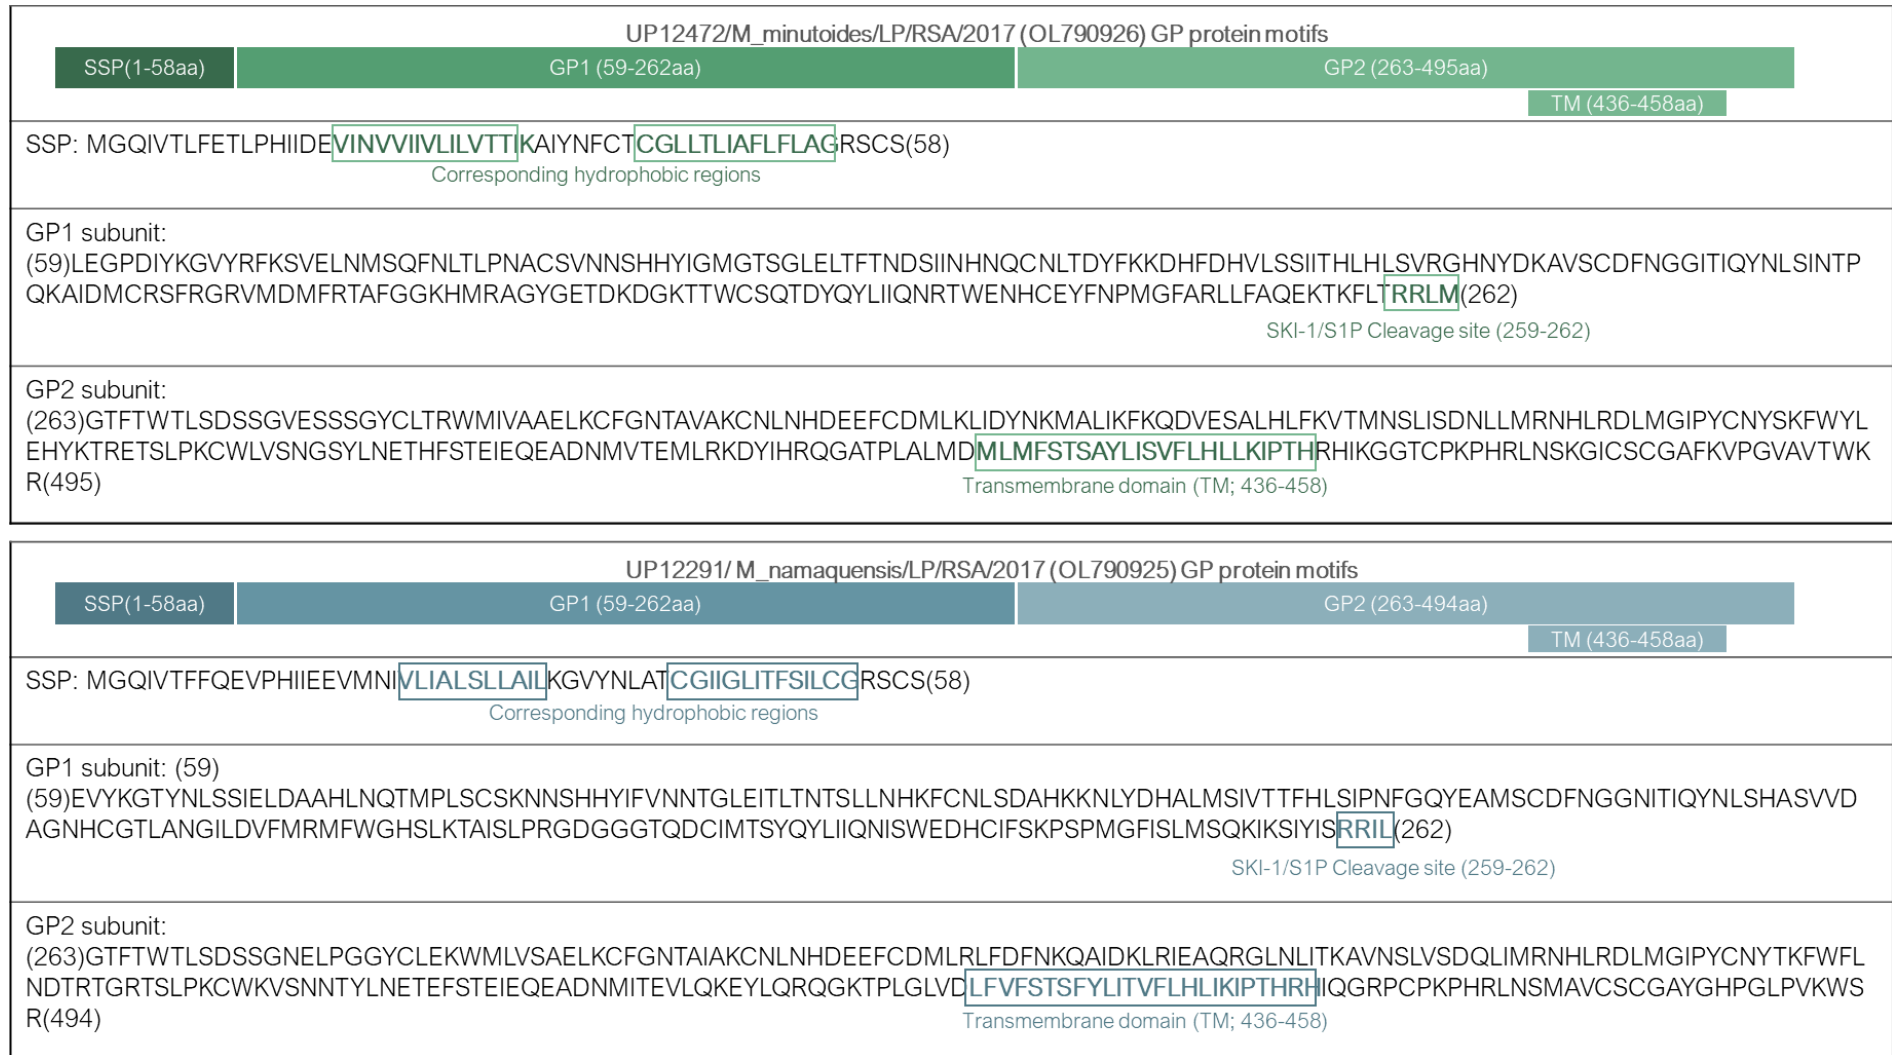

**Figure S8:** Schematic indicating the annotations of the GPC protein. The signal peptide (SSP), G1 and G2 regions are indicated with hydrophobic regions in SSP, SKI-1/S1P cleavage sites and transmembrane domain highlighted. Top half of the schematic shows the annotations for UP12472/M\_minutoides/LP/RSA/2017 (OL790926) GP protein motifs and the bottom for UP12291/ M\_namaquensis/LP/RSA/2017 (OL790925) GP protein motifs.

|                                                 |    |    |    |
|-------------------------------------------------|----|----|----|
| NC_018710_Lunk_virus_NKS1S                      | LT | RR | LM |
| UP12472_M_minutoides_LP_RSA_2017                | LT | RR | LM |
| EU480452_Lymphocytic_choriomeningitis_virus     | LT | RR | LA |
| NC_039009_Rat_arenavirus_1_YN2013S              | LT | RR | LA |
| NC_039012_Souris_virus_PREDICT0577553025304S    | LS | RR | LR |
| EU136038_Denong_virus_07102678S                 | LT | RR | LA |
| KJ909794_Wenzhou_virus_Rn242S                   | IS | RR | LL |
| MG736234_Rat_MamV_RnYM512016S                   | IS | RR | LL |
| MG736232_Rat_MamV_RtYM512015S                   | IS | RR | LL |
| AB972430_Luli_virus_SLW1                        | IS | RR | LM |
| AB693148_Luna_virus_LSK2                        | IS | RR | LM |
| NC_004296_Lassa_virus_Josiah                    | IS | RR | LL |
| LC387468_Lassa_MamV_Nig1217S                    | IS | RR | LL |
| AY342390_Mobala_virus_ACAR_3080_MRC5_P2S        | IS | RR | LM |
| JN561684_Mopeia_virus_strain_AN_21366BNIS       | IS | RR | LL |
| AY772170_Mopeia_virus_AN20410S                  | IS | RR | LL |
| KC669697_Loie_River_virus_R4937S                | IS | RR | LL |
| MZ065541_Kwanza_MamV_ANG0206S                   | IS | RR | LL |
| MZ065537_Bitu_MamV_ANG0052S                     | LS | RR | LR |
| EU914103_Morogoro_virus_strain_3017_2004S       | IS | RR | LL |
| NC_027135_Okahandja_virus_strain_N73_OkhMi.n4_S | LS | RR | LR |
| NC_027134_Mariental_virus_N27_MRMin9S           | IS | RR | IL |
| UP12291_M_namaquensis_LP_RSA_2017               | IS | RR | IL |
| DQ328877_Ippy_virus_strain_Dak_An_B_188_dS      | IS | RR | LM |
| NC_038367_Solwezi_virus_13ZR68_S                | TS | RR | LL |
| FJ952384_Lujo_virus_S                           | KV | RK | LM |
| EU260463_Chapare_virus_810419S                  | KL | RR | LQ |

**Figure S9:** Alignment of the RRLL recognition, SP1/SKI-1 cleavage site of mammarenaviruses. The terminal 6 amino acid residues of the GP1 submit are depicted with the recognition site boxed in red. The alignment contains mainly Old-World arenaviruses, as they represent alpha-dystroglycan receptor users, with the viruses highlighted in green having been confirmed as users of alpha-dystroglycan. Viruses highlighted in yellow represent those described here.

**Table S1 Surveillance data:**

| Laboratory number | Field number | Museum number | Date collected | Species ID (Morphological)      | Province | Sex | Samples | Arenavirus Results | Hantavirus Results |
|-------------------|--------------|---------------|----------------|---------------------------------|----------|-----|---------|--------------------|--------------------|
| UP 4961           | UP 4961      | TM49121       | 27-Feb-15      | <i>Aethomys ineptus s.l.</i>    | Limpopo  | F   | Fe      | Neg                | Neg                |
| UP 4962           | UP 4962      | TM49197       | 27-Feb-15      | <i>Gerbilliscus leucogaster</i> | Limpopo  | M   | Fe      | Neg                | Neg                |
| UP 4963           | UP 4963      | TM49122       | 27-Feb-15      | <i>Aethomys ineptus s.l.</i>    | Limpopo  | M   | Fe      | Neg                | Neg                |
| UP 4967           | UP 4967      | TM49137       | 27-Feb-15      | <i>Aethomys ineptus s.l.</i>    | Limpopo  | F   | Fe      | Neg                | Neg                |
| UP 4968           | UP 4968      | TM49210       | 27-Feb-15      | <i>Saccostomus campestris</i>   | Limpopo  | F   | Fe      | Neg                | Neg                |

|          |         |                      |            |                                    |         |   |        |     |     |
|----------|---------|----------------------|------------|------------------------------------|---------|---|--------|-----|-----|
| UP 4969  | UP 4969 | TM49123              | 27-Feb-15  | <i>Aethomys ineptus s.l.</i>       | Limpopo | M | Fe     | Neg | Neg |
| UP 4973  | UP 4973 | TM49216              | 27-Feb-15  | <i>Graphiurus murinus</i>          | Limpopo | M | Fe     | Neg | Neg |
| UP 4995  | UP 4995 | TM49199              | 01-Mar-15  | <i>Mastomys natalensis s.l.</i>    | Limpopo | M | Fe     | Neg | Neg |
| UP 5011  | UP 5011 | TM49140              | 01-Mar-15  | <i>Steatomys sp.</i>               | Limpopo | M | Fe     | Neg | Neg |
| UP 5012  | UP 5012 | TM49124              | 01-Mar-15  | <i>Aethomys ineptus s.l.</i>       | Limpopo | M | Fe     | Neg | Neg |
| UP 5015  | UP 5015 | TM49141              | 01-Mar-15  | <i>Steatomys sp.</i>               | Limpopo | F | Fe     | Neg | Neg |
| UP 5353  | UPR 003 | TM49208              | 12-May-15  | <i>Elephantulus brachyrhynchus</i> | Limpopo | M | Fe     | Neg | Neg |
| UP 5354  | UPR 004 | TM49200              | 12-May-15  | <i>Mastomys natalensis s.l.</i>    | Limpopo | M | Fe     | Neg | Neg |
| UP 5355  | UPR 005 | TM49209              | 12-May-15  | <i>Elephantulus brachyrhynchus</i> | Limpopo | M | Fe     | Neg | Neg |
| UP 5356  | UPR 006 | TM49201              | 12-May-15  | <i>Mastomys natalensis s.l.</i>    | Limpopo | M | Fe     | Neg | Neg |
| UP 5525  | UPR 086 | TM49126              | 12-July-15 | <i>Aethomys ineptus s.l.</i>       | Limpopo | M | Fe     | Neg | Neg |
| UP 5934  | UPR 091 | TM49220              | 15-Sep-15  | <i>Mus (Nannomys) sp.</i>          | Limpopo | F | Fe     | Neg | Neg |
| UP 5935  | UPR 092 | TM49215              | 15-Sep-15  | <i>Micaelamys namaquensis</i>      | Limpopo | M | Fe     | Neg | Neg |
| UP 5939  | UPR 096 | TM49221              | 15-Sep-15  | <i>Mus (Nannomys) sp.</i>          | Limpopo | M | Fe     | Neg | Neg |
| UP 12001 | UPR 141 | TM49202              | 13-Nov-15  | <i>Mastomys natalensis s.l.</i>    | Limpopo | M | Ki     | Neg | Neg |
| UP 12002 | UPR 142 | TM49138              | 13-Nov-15  | <i>Aethomys ineptus s.l.</i>       | Limpopo | F | Ki     | Neg | Neg |
| UP 12003 | UPR 143 | TM49131              | 13-Nov-15  | <i>Aethomys ineptus s.l.</i>       | Limpopo | F | Ki     | Neg | Neg |
| UP 12004 | UPR 144 | TM49143              | 13-Nov-15  | <i>Steatomys sp.</i>               | Limpopo | F | Ki     | Neg | Neg |
| UP 12005 | UPR 145 | TM49129              | 13-Nov-15  | <i>Aethomys ineptus s.l.</i>       | Limpopo | F | Ki     | Neg | Neg |
| UP 12006 | UPR 146 | TM49130              | 13-Nov-15  | <i>Aethomys ineptus s.l.</i>       | Limpopo | F | Ki     | Neg | Neg |
| UP 12007 | UPR 147 | TM49144              | 13-Nov-15  | <i>Steatomys sp.</i>               | Limpopo | M | Ki     | Neg | Neg |
| UP 12008 | UPR 148 | TM49222              | 13-Nov-15  | <i>Mus (Nannomys) sp.</i>          | Limpopo | M | Ki     | Neg | Neg |
| UP 12009 | UPR 149 | TM49132              | 13-Nov-15  | <i>Aethomys ineptus s.l.</i>       | Limpopo | F | Ki     | Neg | Neg |
| UP 12010 | UPR 150 | TM49203              | 19-Jan-16  | <i>Mastomys natalensis s.l.</i>    | Limpopo | F | Fe /Ki | Neg | Neg |
| UP 12011 | UPR 151 | TM49145              | 19-Jan-16  | <i>Steatomys sp.</i>               | Limpopo | F | Fe/ Ki | Neg | Neg |
| UP 12012 | UPR 152 | TM49198              | 19-Jan-16  | <i>Gerbilliscus leucogaster</i>    | Limpopo | F | Fe/ Ki | Neg | Neg |
| UP 12013 | UPR 153 | TM49204              | 19-Jan-16  | <i>Mastomys natalensis s.l.</i>    | Limpopo | F | Ki     | Neg | Neg |
| UP 12014 | UPR 154 | TM49205              | 19-Jan-16  | <i>Mastomys natalensis s.l.</i>    | Limpopo | F | Ki     | Neg | Neg |
| UP 12016 | UPR 156 | TM49139              | 20-Jan-16  | <i>Aethomys ineptus s.l.</i>       | Limpopo | M | Ki     | Neg | Neg |
| UP 12017 | UPR 157 | TM49133              | 20-Jan-16  | <i>Aethomys ineptus s.l.</i>       | Limpopo | M | Fe/ Ki | Neg | Neg |
| UP 12018 | UPR 158 | TM49206              | 20-Jan-16  | <i>Mastomys natalensis s.l.</i>    | Limpopo | M | Ki     | Neg | Neg |
| UP 12019 | UPR 159 | TM49211              | 20-Jan-16  | <i>Saccostomus campestris</i>      | Limpopo | M | Ki     | Neg | Neg |
| UP 12020 | UPR 160 | TM49207              | 20-Jan-16  | <i>Mastomys natalensis s.l.</i>    | Limpopo | F | Ki     | Neg | Neg |
| UP 12021 | UPR 161 | TM49134              | 20-Jan-16  | <i>Aethomys ineptus s.l.</i>       | Limpopo | M | Ki     | Neg | Neg |
| UP 12022 | UPR 162 | TM49135              | 20-Jan-16  | <i>Aethomys ineptus s.l.</i>       | Limpopo | F | Ki     | Neg | Neg |
| UP 12023 | UPR 163 | TM49212              | 21-Jan-16  | <i>Saccostomus campestris</i>      | Limpopo | F | Fe/ Ki | Neg | Neg |
| UP 12024 | UPR 164 | TM49136              | 21-Jan-16  | <i>Aethomys ineptus s.l.</i>       | Limpopo | F | Fe/ Ki | Neg | Neg |
| UP 12061 | UPR 201 | TM49242              | 05-Apr-16  | <i>Aethomys ineptus s.l.</i>       | Limpopo | F | Ki     | Neg | Neg |
| UP 12062 | UPR 202 | Released; no voucher | 05-Apr-16  | <i>Saccostomus campestris</i>      | Limpopo | M | Fe     | Neg | Neg |
| UP 12065 | UPR 203 | TM49243              | 06-Apr-16  | <i>Saccostomus campestris</i>      | Limpopo | M | Fe/ Ki | Neg | Neg |
| UP 12066 | UPR 204 | TM49224              | 06-Apr-16  | <i>Graphiurus murinus</i>          | Limpopo | F | Fe/ Ki | Neg | Neg |
| UP 12067 | UPR 205 | TM49225              | 06-Apr-16  | <i>Aethomys ineptus s.l.</i>       | Limpopo | F | Fe/ Ki | Neg | Neg |
| UP 12068 | UPR 206 | Released; no voucher | 07-Apr-16  | <i>Saccostomus campestris</i>      | Limpopo | F | Fe     | Neg | Neg |

|          |         |                        |           |                                    |         |   |        |     |     |
|----------|---------|------------------------|-----------|------------------------------------|---------|---|--------|-----|-----|
| UP 12070 | UPR 207 | TM49226                | 07-Apr-16 | <i>Aethomys ineptus s.l.</i>       | Limpopo | F | Ki     | Neg | Neg |
| UP 12071 | UPR 208 | TM49227                | 08-Apr-16 | <i>Aethomys ineptus s.l.</i>       | Limpopo | F | Fe/ Ki | Neg | Neg |
| UP 12072 | UPR 209 | TM49244                | 08-Apr-16 | <i>Gerbilliscus leucogaster</i>    | Limpopo | F | Ki     | Neg | Neg |
| UP 12073 | UPR 210 | TM49228                | 08-Apr-16 | <i>Aethomys ineptus s.l.</i>       | Limpopo | M | Fe/ Ki | Neg | Neg |
| UP 12074 | UPR 211 | TM49229                | 08-Apr-16 | <i>Aethomys ineptus s.l.</i>       | Limpopo | M | Ki     | Neg | Neg |
| UP 12075 | UPR 212 | Released; no voucher   | 07-Jun-16 | <i>Mastomys natalensis s.l.</i>    | Limpopo | M | Fe     | Neg | Neg |
| UP 12077 | UPR 213 | Released; no voucher   | 07-Jun-16 | <i>Saccostomus campestris</i>      | Limpopo | F | Fe     | Neg | Neg |
| UP 12081 | UPR 214 | TM49230                | 07-Jun-16 | <i>Aethomys ineptus s.l.</i>       | Limpopo | M | Fe/ Ki | Neg | Neg |
| UP 12082 | UPR 215 | TM49245                | 07-Jun-16 | <i>Aethomys ineptus s.l.</i>       | Limpopo | F | Fe/ Ki | Neg | Neg |
| UP 12083 | UPR 216 | TM49246                | 07-Jun-16 | <i>Acomys selousi</i>              | Limpopo | F | Fe/ Ki | Neg | Neg |
| UP 12084 | UPR 217 | TM49247                | 08-Jun-16 | <i>Saccostomus campestris</i>      | Limpopo | M | Fe/ Ki | Neg | Neg |
| UP 12085 | UPR 218 | TM49231                | 08-Jun-16 | <i>Micaelamys namaquensis</i>      | Limpopo | M | Fe/ Ki | Neg | Neg |
| UP 12086 | UPR 219 | TM49248                | 08-Jun-16 | <i>Gerbilliscus leucogaster</i>    | Limpopo | M | Fe/ Ki | Neg | Neg |
| UP 12087 | UPR 220 | TM49249                | 08-Jun-16 | <i>Aethomys ineptus s.l.</i>       | Limpopo | M | Fe/ Ki | Neg | Neg |
| UP 12088 | UPR 221 | TM49232                | 09-Jun-16 | <i>Aethomys ineptus s.l.</i>       | Limpopo | F | Fe/ Ki | Neg | Neg |
| UP 12089 | UPR 222 | Released; no voucher   | 09-Jun-16 | <i>Mastomys natalensis s.l.</i>    | Limpopo | M | Fe     | Neg | Neg |
| UP 12090 | UPR 223 | Released; no voucher   | 10-Jun-16 | <i>Steatomys sp.</i>               | Limpopo | M | Fe     | Neg | Neg |
| UP 12132 | UPR 265 | TM49250                | 06-Sep-16 | <i>Aethomys ineptus s.l.</i>       | Limpopo | F | Fe/ Ki | Neg | Neg |
| UP 12133 | UPR 266 | TM49251                | 06-Sep-16 | <i>Gerbilliscus leucogaster</i>    | Limpopo | M | Fe/ Ki | Neg | Neg |
| UP 12134 | UPR 267 | Released; no voucher   | 06-Sep-16 | <i>Micaelamys namaquensis</i>      | Limpopo | F | Fe     | Neg | Neg |
| UP 12137 | UPR 268 | TM49252                | 06-Sep-16 | <i>Micaelamys namaquensis</i>      | Limpopo | M | Fe/ Ki | Neg | Neg |
| UP 12138 | UPR 269 | TM49253                | 06-Sep-16 | <i>Micaelamys namaquensis</i>      | Limpopo | M | Ki     | Neg | Neg |
| UP 12139 | UPR 270 | TM50720                | 07-Sep-16 | <i>Gerbilliscus leucogaster</i>    | Limpopo | M | Ki     | Neg | Neg |
| UP 12140 | UPR 271 | Released; no voucher   | 07-Sep-16 | <i>Micaelamys namaquensis</i>      | Limpopo | M | Fe     | Neg | Neg |
| UP 12142 | UPR 272 | TM49233                | 07-Sep-16 | <i>Elephantulus brachyrhynchus</i> | Limpopo | M | Fe/ Ki | Neg | Neg |
| UP 12143 | UPR 273 | Released; no voucher   | 08-Sep-16 | <i>Micaelamys namaquensis</i>      | Limpopo | M | Fe     | Neg | Neg |
| UP 12144 | UPR 274 | TM50723                | 08-Sep-16 | <i>Micaelamys namaquensis</i>      | Limpopo | F | Ki     | Neg | Neg |
| UP 12145 | UPR 275 | TM49234                | 09-Sep-16 | <i>Micaelamys namaquensis</i>      | Limpopo | F | Fe/ Ki | Neg | Neg |
| UP 12146 | UPR 276 | TM49235                | 09-Sep-16 | <i>Acomys selousi</i>              | Limpopo | M | Fe/ Ki | Neg | Neg |
| UP 12147 | UPR 277 | TM49254                | 09-Sep-16 | <i>Steatomys sp.</i>               | Limpopo | F | Fe/ Ki | Neg | Neg |
| UP 12148 | UPR 278 | TM49255                | 09-Sep-16 | <i>Saccostomus campestris</i>      | Limpopo | M | Fe/ Ki | Neg | Neg |
| UP 12149 | UPR 279 | Released; no voucher   | 09-Sep-16 | <i>Saccostomus campestris</i>      | Limpopo | M | Fe     | Neg | Neg |
| UP 12151 | UPR 280 | TM50724                | 09-Sep-16 | <i>Saccostomus campestris</i>      | Limpopo | M | Ki     | Neg | Neg |
| UP 12152 | UPR 281 | Released; no voucher-  | 10-Nov-16 | <i>Acomys selousi</i>              | Limpopo | M | Fe     | Neg | Neg |
| UP 12154 | UPR 282 | TM49256                | 08-Nov-16 | <i>Micaelamys namaquensis</i>      | Limpopo | M | Ki     | Neg | Neg |
| UP 12155 | UPR 283 | Released; no voucher   | 08-Nov-16 | <i>Mastomys natalensis s.l.</i>    | Limpopo | F | Fe     | Neg | Neg |
| UP 12157 | UPR 284 | TM49257                | 08-Nov-16 | <i>Aethomys ineptus s.l.</i>       | Limpopo | F | Fe/ Ki | Neg | Neg |
| UP 12158 | UPR 285 | Released; no voucher - | 08-Nov-16 | <i>Saccostomus campestris</i>      | Limpopo | M | Fe/ Ki | Neg | Neg |
| UP 12163 | UPR 286 | Released; no voucher - | 08-Nov-16 | <i>Gerbilliscus leucogaster</i>    | Limpopo | F | Fe     | Neg | Neg |



|          |         |                        |           |                                       |         |   |        |     |     |
|----------|---------|------------------------|-----------|---------------------------------------|---------|---|--------|-----|-----|
| UP 12165 | UPR 287 | TM49258                | 08-Nov-16 | <i>Aethomys ineptus s.l.</i>          | Limpopo | F | Fe/ Ki | Neg | Neg |
| UP 12166 | UPR 288 | TM49259                | 09-Nov-16 | <i>Gerbilliscus leucogaster</i>       | Limpopo | M | Ki     | Neg | Neg |
| UP 12167 | UPR 289 | TM49260                | 09-Nov-16 | <i>Aethomys ineptus s.l.</i>          | Limpopo | F | Fe/ Ki | Neg | Neg |
| UP 12168 | UPR 290 | TM49261                | 10-Nov-16 | <i>Micaelamys namaquensis</i>         | Limpopo | M | Fe/ Ki | Neg | Neg |
| UP 12169 | UPR 291 | TM49262                | 10-Nov-16 | <i>Mus (Nannomys) minutoides s.l.</i> | Limpopo | F | Fe/ Ki | Neg | Neg |
| UP 12170 | UPR 292 | TM49263                | 10-Nov-16 | <i>Aethomys ineptus s.l.</i>          | Limpopo | M | Fe/ Ki | Neg | Neg |
| UP 12172 | UPR 294 | TM49264                | 11-Nov-16 | <i>Mus (Nannomys) minutoides s.l.</i> | Limpopo | M | Ki     | Neg | Neg |
| UP 12173 | UPR 295 | TM49265                | 11-Nov-16 | <i>Aethomys ineptus s.l.</i>          | Limpopo | F | Ki     | Neg | Neg |
| UP 12176 | UPR 298 | TM49266                | 07-Feb-17 | <i>Saccostomus campestris</i>         | Limpopo | M | Ki     | Neg | Neg |
| UP 12177 | UPR 299 | TM49267                | 08-Feb-17 | <i>Aethomys ineptus s.l.</i>          | Limpopo | M | Fe/ Ki | Neg | Neg |
| UP 12178 | UPR 300 | TM49268                | 08-Feb-17 | <i>Aethomys ineptus s.l.</i>          | Limpopo | M | Fe/ Ki | Neg | Neg |
| UP 12179 | UPR 301 | TM49269                | 08-Feb-17 | <i>Aethomys ineptus s.l.</i>          | Limpopo | F | Fe/ Ki | Neg | Neg |
| UP 12180 | UPR 302 | TM49270                | 09-Feb-17 | <i>Aethomys ineptus s.l.</i>          | Limpopo | M | Fe/ Ki | Neg | Neg |
| UP 12181 | UPR 303 | TM49271                | 09-Feb-17 | <i>Aethomys ineptus s.l.</i>          | Limpopo | F | Fe/ Ki | Neg | Neg |
| UP 12182 | UPR 304 | TM49272                | 10-Feb-17 | <i>Saccostomus campestris</i>         | Limpopo | F | Ki     | Neg | Neg |
| UP 12183 | UPR 305 | Released; no voucher - | 27-Mar-17 | <i>Gerbilliscus leucogaster</i>       | Limpopo | F | Fe     | Neg | Neg |
| UP 12184 | UPR 306 | TM50725                | 27-Mar-17 | <i>Gerbilliscus leucogaster</i>       | Limpopo | F | Fe/ Ki | Neg | Neg |
| UP 12185 | UPR 307 | TM50540                | 27-Mar-17 | <i>Gerbilliscus leucogaster</i>       | Limpopo | F | Fe/ Ki | Neg | Neg |
| UP 12186 | UPR 308 | Released; no voucher - | 27-Mar-17 | <i>Gerbilliscus leucogaster</i>       | Limpopo | F | Fe     | Neg | Neg |
| UP 12187 | UPR 309 | TM50541                | 27-Mar-17 | <i>Gerbilliscus leucogaster</i>       | Limpopo | F | Ki     | Neg | Neg |
| UP 12188 | UPR 310 | TM50726                | 27-Mar-17 | <i>Saccostomus campestris</i>         | Limpopo | M | Fe/ Ki | Neg | Neg |
| UP 12189 | UPR 311 | TM50727                | 27-Mar-17 | <i>Saccostomus campestris</i>         | Limpopo | F | Fe/ Ki | Neg | Neg |
| UP 12190 | UPR 312 | TM50728                | 27-Mar-17 | <i>Steatomys sp.</i>                  | Limpopo | M | Fe/ Ki | Neg | Neg |
| UP 12191 | UPR 313 | TM50729                | 27-Mar-17 | <i>Steatomys sp.</i>                  | Limpopo | F | Fe/ Ki | Neg | Neg |
| UP 12192 | UPR 314 | TM50730                | 28-Mar-17 | <i>Steatomys sp.</i>                  | Limpopo | M | Fe/ Ki | Neg | Neg |
| UP 12193 | UPR 315 | TM50542                | 28-Mar-17 | <i>Gerbilliscus leucogaster</i>       | Limpopo | M | Fe/ Ki | Neg | Neg |
| UP 12194 | UPR 316 | NHCPHE_MAM-20          | 28-Mar-17 | <i>Gerbilliscus leucogaster</i>       | Limpopo | F | Fe/ Ki | Neg | Neg |
| UP 12195 | UPR 317 | NHCPHE_MAM-21          | 28-Mar-17 | <i>Gerbilliscus leucogaster</i>       | Limpopo | M | Fe/ Ki | Neg | Neg |
| UP 12197 | UPR 319 | NHCPHE_MAM-22          | 28-Mar-17 | <i>Gerbilliscus leucogaster</i>       | Limpopo | M | Fe/ Ki | Neg | Neg |
| UP 12198 | UPR 320 | Released; no voucher - | 28-Mar-17 | <i>Gerbilliscus leucogaster</i>       | Limpopo | F | Fe     | Neg | Neg |
| UP 12199 | UPR 321 | Released; no voucher - | 28-Mar-17 | <i>Gerbilliscus leucogaster</i>       | Limpopo | F | Fe     | Neg | Neg |
| UP 12200 | UPR 322 | Released; no voucher - | 28-Mar-17 | <i>Gerbilliscus leucogaster</i>       | Limpopo | M | Fe     | Neg | Neg |
| UP 12201 | UPR 323 | TM50731                | 28-Mar-17 | <i>Steatomys sp.</i>                  | Limpopo | M | Fe/ Ki | Neg | Neg |
| UP 12202 | UPR 324 | NHCPHE_MAM-23          | 28-Mar-17 | <i>Gerbilliscus leucogaster</i>       | Limpopo | F | Ki     | Neg | Neg |
| UP 12203 | UPR 325 | TM50732                | 28-Mar-17 | <i>Gerbilliscus leucogaster</i>       | Limpopo | M | Fe/ Ki | Neg | Neg |
| UP 12204 | UPR 326 | TM50717                | 28-Mar-17 | <i>Aethomys ineptus s.l.</i>          | Limpopo | F | Fe/ Ki | Neg | Neg |
| UP 12205 | UPR 327 | TM50733                | 28-Mar-17 | <i>Mastomys natalensis s.l.</i>       | Limpopo | M | Fe/ Ki | Neg | Neg |
| UP 12206 | UPR 328 | TM50734                | 28-Mar-17 | <i>Mastomys natalensis s.l.</i>       | Limpopo | F | Fe/ Ki | Neg | Neg |
| UP 12207 | UPR 329 | TM50543                | 28-Mar-17 | <i>Gerbilliscus leucogaster</i>       | Limpopo | M | Fe/ Ki | Neg | Neg |

|          |         |                         |           |                                 |         |   |        |     |     |
|----------|---------|-------------------------|-----------|---------------------------------|---------|---|--------|-----|-----|
| UP 12208 | UPR 330 | NHCPHE_MA<br>M-3        | 29-Mar-17 | <i>Gerbilliscus leucogaster</i> | Limpopo | F | Fe/ Ki | Neg | Neg |
| UP 12209 | UPR 331 | TM50735                 | 29-Mar-17 | <i>Mastomys natalensis s.l.</i> | Limpopo | M | Fe/ Ki | Neg | Neg |
| UP 12210 | UPR 332 | TM50736                 | 29-Mar-17 | <i>Mastomys natalensis s.l.</i> | Limpopo | F | Fe/ Ki | Neg | Neg |
| UP 12211 | UPR 333 | TM50737                 | 29-Mar-17 | <i>Steatomys sp.</i>            | Limpopo | F | Fe/ Ki | Neg | Neg |
| UP 12212 | UPR 334 | TM50738                 | 29-Mar-17 | <i>Mastomys natalensis s.l.</i> | Limpopo | F | Fe/ Ki | Neg | Neg |
| UP 12213 | UPR 335 | TM49273                 | 29-Mar-17 | <i>Crociodura hirta</i>         | Limpopo | M | Fe/ Ki | Neg | Neg |
| UP 12214 | UPR 336 | Released; no<br>voucher | 29-Mar-17 | <i>Steatomys sp.</i>            | Limpopo | F | Fe     | Neg | Neg |
| UP 12215 | UPR 337 | TM50739                 | 29-Mar-17 | <i>Mus (Nannomys) sp.</i>       | Limpopo | F | Fe/ Ki | Neg | Neg |
| UP 12216 | UPR 338 | TM50740                 | 29-Mar-17 | <i>Steatomys sp.</i>            | Limpopo | F | Fe/ Ki | Neg | Neg |
| UP 12217 | UPR 339 | TM50741                 | 29-Mar-17 | <i>Mastomys natalensis s.l.</i> | Limpopo | M | Fe/ Ki | Neg | Neg |
| UP 12218 | UPR 340 | TM50742                 | 29-Mar-17 | <i>Saccostomus campestris</i>   | Limpopo | M | Fe/ Ki | Neg | Neg |
| UP 12219 | UPR 341 | TM50743                 | 29-Mar-17 | <i>Steatomys sp.</i>            | Limpopo | F | Fe/ Ki | Neg | Neg |
| UP 12220 | UPR 342 | Released; no<br>voucher | 29-Mar-17 | <i>Steatomys sp.</i>            | Limpopo | M | Fe     | Neg | Neg |
| UP 12221 | UPR 343 | Released; no<br>voucher | 29-Mar-17 | <i>Gerbilliscus leucogaster</i> | Limpopo | F | Fe     | Neg | Neg |
| UP 12222 | UPR 344 | Released; no<br>voucher | 29-Mar-17 | <i>Steatomys sp.</i>            | Limpopo | M | Fe     | Neg | Neg |
| UP 12223 | UPR 345 | TM50544                 | 29-Mar-17 | <i>Gerbilliscus leucogaster</i> | Limpopo | M | Fe/ Ki | Neg | Neg |
| UP 12224 | UPR 346 | Released; no<br>voucher | 29-Mar-17 | <i>Gerbilliscus leucogaster</i> | Limpopo | F | Fe     | Neg | Neg |
| UP 12225 | UPR 347 | Released; no<br>voucher | 29-Mar-17 | <i>Mastomys natalensis s.l.</i> | Limpopo | F | Fe     | Neg | Neg |
| UP 12226 | UPR 348 | Released; no<br>voucher | 29-Mar-17 | <i>Gerbilliscus leucogaster</i> | Limpopo | M | Fe     | Neg | Neg |
| UP 12227 | UPR 349 | Released; no<br>voucher | 29-Mar-17 | <i>Gerbilliscus leucogaster</i> | Limpopo | F | Fe     | Neg | Neg |
| UP 12228 | UPR 350 | Released; no<br>voucher | 29-Mar-17 | <i>Gerbilliscus leucogaster</i> | Limpopo | M | Fe     | Neg | Neg |
| UP 12229 | UPR 351 | Released; no<br>voucher | 29-Mar-17 | <i>Steatomys sp.</i>            | Limpopo | F | Fe     | Neg | Neg |
| UP 12230 | UPR 352 | Released; no<br>voucher | 29-Mar-17 | <i>Steatomys sp.</i>            | Limpopo | M | Fe     | Neg | Neg |
| UP 12231 | UPR 353 | Released; no<br>voucher | 29-Mar-17 | <i>Steatomys sp.</i>            | Limpopo | M | Fe     | Neg | Neg |
| UP 12232 | UPR 354 | Released; no<br>voucher | 29-Mar-17 | <i>Steatomys sp.</i>            | Limpopo | M | Fe     | Neg | Neg |
| UP 12233 | UPR 355 | Released; no<br>voucher | 29-Mar-17 | <i>Gerbilliscus leucogaster</i> | Limpopo | M | Fe     | Neg | Neg |
| UP 12234 | UPR 356 | TM50744                 | 29-Mar-17 | <i>Gerbilliscus leucogaster</i> | Limpopo | M | Ki     | Neg | Neg |
| UP 12235 | UPR 357 | Released; no<br>voucher | 29-Mar-17 | <i>Gerbilliscus leucogaster</i> | Limpopo | M | Fe     | Neg | Neg |
| UP 12236 | UPR 358 | TM50745                 | 30-Mar-17 | <i>Saccostomus campestris</i>   | Limpopo | M | Fe/ Ki | Neg | Neg |
| UP 12237 | UPR 359 | TM50746                 | 30-Mar-17 | <i>Mus (Nannomys) sp.</i>       | Limpopo | M | Ki     | Neg | Neg |
| UP 12238 | UPR 360 | TM50747                 | 30-Mar-17 | <i>Mastomys natalensis s.l.</i> | Limpopo | F | Fe/ Ki | Neg | Neg |
| UP 12240 | UPR 362 | TM50748                 | 30-Mar-17 | <i>Saccostomus campestris</i>   | Limpopo | M | Ki     | Neg | Neg |
| UP 12241 | UPR 363 | Released; no<br>voucher | 30-Mar-17 | <i>Steatomys sp.</i>            | Limpopo | M | Fe     | Neg | Neg |
| UP 12242 | UPR 364 | TM50749                 | 30-Mar-17 | <i>Aethomys ineptus s.l.</i>    | Limpopo | F | Fe/ Ki | Neg | Neg |
| UP 12243 | UPR 365 | Released; no<br>voucher | 30-Mar-17 | <i>Gerbilliscus leucogaster</i> | Limpopo | M | Fe     | Neg | Neg |
| UP 12244 | UPR 366 | TM50750                 | 30-Mar-17 | <i>Saccostomus campestris</i>   | Limpopo | F | Fe/ Ki | Neg | Neg |

|          |         |                      |           |                                 |         |   |        |     |     |
|----------|---------|----------------------|-----------|---------------------------------|---------|---|--------|-----|-----|
| UP 12245 | UPR 367 | Released; no voucher | 30-Mar-17 | <i>Gerbilliscus leucogaster</i> | Limpopo | F | Fe     | Neg | Neg |
| UP 12246 | UPR 368 | TM50545              | 30-Mar-17 | <i>Gerbilliscus leucogaster</i> | Limpopo | M | Fe/ Ki | Neg | Neg |
| UP 12247 | UPR 369 | Released; no voucher | 30-Mar-17 | <i>Gerbilliscus leucogaster</i> | Limpopo | M | Fe     | Neg | Neg |
| UP 12248 | UPR 370 | TM50751              | 30-Mar-17 | <i>Saccostomus campestris</i>   | Limpopo | M | Fe/ Ki | Neg | Neg |
| UP 12249 | UPR 371 | Released; no voucher | 30-Mar-17 | <i>Gerbilliscus leucogaster</i> | Limpopo | F | Fe     | Neg | Neg |
| UP 12250 | UPR 372 | Released; no voucher | 30-Mar-17 | <i>Gerbilliscus leucogaster</i> | Limpopo | F | Fe     | Neg | Neg |
| UP 12251 | UPR 373 | Released; no voucher | 30-Mar-17 | <i>Steatomys sp.</i>            | Limpopo | M | Fe     | Neg | Neg |
| UP 12252 | UPR 374 | Released; no voucher | 30-Mar-17 | <i>Mastomys natalensis s.l.</i> | Limpopo | M | Fe     | Neg | Neg |
| UP 12253 | UPR 375 | Released; no voucher | 31-Mar-17 | <i>Steatomys sp.</i>            | Limpopo | F | Fe     | Neg | Neg |
| UP 12254 | UPR 376 | TM50752              | 31-Mar-17 | <i>Steatomys sp.</i>            | Limpopo | M | Ki     | Neg | Neg |
| UP 12255 | UPR 377 | TM50753              | 31-Mar-17 | <i>Mastomys natalensis s.l.</i> | Limpopo | F | Ki     | Neg | Neg |
| UP 12256 | UPR 378 | TM50754              | 31-Mar-17 | <i>Graphiurus murinus</i>       | Limpopo | F | Ki     | Neg | Neg |
| UP 12257 | UPR 379 | Released; no voucher | 31-Mar-17 | <i>Mastomys natalensis s.l.</i> | Limpopo | F | Fe     | Neg | Neg |
| UP 12258 | UPR 380 | TM50755              | 31-Mar-17 | <i>Steatomys sp.</i>            | Limpopo | F | Fe/ Ki | Neg | Neg |
| UP 12259 | UPR 381 | TM50546              | 31-Mar-17 | <i>Gerbilliscus leucogaster</i> | Limpopo | F | Fe/ Ki | Neg | Neg |
| UP 12260 | UPR 382 | TM50756              | 31-Mar-17 | <i>Steatomys krebsii</i>        | Limpopo | F | Fe/ Ki | Neg | Neg |
| UP 12261 | UPR 383 | Released; no voucher | 31-Mar-17 | <i>Mastomys natalensis s.l.</i> | Limpopo | M | Fe     | Neg | Neg |
| UP 12262 | UPR 384 | Released; no voucher | 31-Mar-17 | <i>Mastomys natalensis s.l.</i> | Limpopo | M | Fe     | Neg | Neg |
| UP 12264 | UPR 386 | Released; no voucher | 31-Mar-17 | <i>Saccostomus campestris</i>   | Limpopo | M | Fe     | Neg | Neg |
| UP 12265 | UPR 387 | TM50757              | 29-Mar-17 | <i>Lemniscomys rosalia</i>      | Limpopo | F | Ki     | Neg | Neg |
| UP 12266 | UPR 388 | TM50758              | 29-Mar-17 | <i>Steatomys sp.</i>            | Limpopo | M | Ki     | Neg | Neg |
| UP 12267 | UPR 389 | TM50759              | 29-Mar-17 | <i>Steatomys sp.</i>            | Limpopo | F | Ki     | Neg | Neg |
| UP 12268 | UPR 390 | TM50760              | 29-Mar-17 | <i>Steatomys sp.</i>            | Limpopo | M | Ki     | Neg | Neg |
| UP 12269 | UPR 391 | TM50761              | 29-Mar-17 | <i>Steatomys sp.</i>            | Limpopo | M | Ki     | Neg | Neg |
| UP 12270 | UPR 392 | TM50762              | 30-Mar-17 | <i>Steatomys sp.</i>            | Limpopo | F | Ki     | Neg | Neg |
| UP 12271 | UPR 393 | TM49274              | 30-Mar-17 | <i>Suncus lixus</i>             | Limpopo | F | Ki     | Neg | Neg |
| UP 12272 | UPR 394 | TM50763              | 30-Mar-17 | <i>Steatomys sp.</i>            | Limpopo | F | Ki     | Neg | Neg |
| UP 12273 | UPR 395 | TM50764              | 30-Mar-17 | <i>Mastomys natalensis s.l.</i> | Limpopo | F | Ki     | Neg | Neg |
| UP 12274 | UPR 396 | TM50765              | 30-Mar-17 | <i>Steatomys sp.</i>            | Limpopo | F | Ki     | Neg | Neg |
| UP 12275 | UPR 397 | TM50766              | 16-May-17 | <i>Mus (Nannomys) sp.</i>       | Limpopo | M | Ki     | Neg | Neg |
| UP 12276 | UPR 398 | TM50767              | 17-May-17 | <i>Mastomys natalensis s.l.</i> | Limpopo | M | Ki     | Neg | Neg |
| UP 12277 | UPR 399 | TM50768              | 17-May-17 | <i>Steatomys sp.</i>            | Limpopo | F | Ki     | Neg | Neg |
| UP 12278 | UPR 400 | TM50769              | 16-May-17 | <i>Mastomys natalensis s.l.</i> | Limpopo | M | Ki     | Neg | Neg |
| UP 12279 | UPR 401 | TM50770              | 17-May-17 | <i>Mastomys natalensis s.l.</i> | Limpopo | M | Ki     | Neg | Neg |
| UP 12280 | UPR 402 | NHCPHE_MA M-4        | 17-May-17 | <i>Mastomys natalensis s.l.</i> | Limpopo | M | Ki     | Neg | Neg |
| UP 12281 | UPR 403 | TM49275              | 17-May-17 | <i>Suncus lixus</i>             | Limpopo | F | Fe/ Ki | Neg | Neg |
| UP 12282 | UPR 404 | NHCPHE_MA M-12       | 17-May-17 | <i>Mastomys natalensis s.l.</i> | Limpopo | F | Fe/ Ki | Neg | Neg |
| UP 12283 | UPR 405 | TM50771              | 17-May-17 | <i>Steatomys sp.</i>            | Limpopo | M | Ki     | Neg | Neg |
| UP 12284 | UPR 406 | TM49276              | 19-May-17 | <i>Suncus lixus</i>             | Limpopo | M | Ki     | Neg | Neg |

|          |         |                      |           |                                      |         |   |        |            |     |
|----------|---------|----------------------|-----------|--------------------------------------|---------|---|--------|------------|-----|
| UP 12285 | UPR 407 | Released; no voucher | 16-May-17 | <i>Aethomys sp./Micaelamys sp.</i>   | Limpopo | M | Fe     | Neg        | Neg |
| UP 12289 | UPR 409 | Released; no voucher | 16-May-17 | <i>Saccostomus campestris</i>        | Limpopo | M | Fe     | Neg        | Neg |
| UP 12291 | UPR 410 | NHCPHE_MA M-1        | 16-May-17 | <i>Micaelamys namaquensis</i>        | Limpopo | M | Fe/ Ki | <b>Pos</b> | Neg |
| UP 12292 | UPR 411 | Released; no voucher | 16-May-17 | <i>Aethomys/Micaelamys sp.</i>       | Limpopo | M | Fe     | Neg        | Neg |
| UP 12294 | UPR 412 | TM50772              | 16-May-17 | <i>Aethomys ineptus s.l.</i>         | Limpopo | F | Fe/ Ki | Neg        | Neg |
| UP 12295 | UPR 413 | TM50773              | 16-May-17 | <i>Aethomys ineptus s.l.</i>         | Limpopo | M | Ki     | Neg        | Neg |
| UP 12296 | UPR 414 | NHCPHE_MA M-24       | 16-May-17 | <i>Gerbilliscus leucogaster</i>      | Limpopo | M | Fe/ Ki | Neg        | Neg |
| UP 12297 | UPR 415 | NHCPHE_MA M-5        | 16-May-17 | <i>Gerbilliscus leucogaster</i>      | Limpopo | F | Fe/ Ki | Neg        | Neg |
| UP 12298 | UPR 416 | TM50774              | 16-May-17 | <i>Mastomys natalensis s.l.</i>      | Limpopo | M | Ki     | Neg        | Neg |
| UP 12299 | UPR 417 | NHCPHE_MA M-6        | 16-May-17 | <i>Mus (Nanomys) minutoides s.l.</i> | Limpopo | F | Ki     | Neg        | Neg |
| UP 12300 | UPR 418 | TM50775              | 16-May-17 | <i>Mastomys natalensis s.l.</i>      | Limpopo | F | Fe/ Ki | Neg        | Neg |
| UP 12301 | UPR 419 | TM50776              | 16-May-17 | <i>Mastomys natalensis s.l.</i>      | Limpopo | M | Ki     | Neg        | Neg |
| UP 12302 | UPR 420 | Released; no voucher | 16-May-17 | <i>Aethomys sp.</i>                  | Limpopo | M | Fe     | Neg        | Neg |
| UP 12303 | UPR 421 | TM50547              | 16-May-17 | <i>Gerbilliscus leucogaster</i>      | Limpopo | F | Fe/ Ki | Neg        | Neg |
| UP 12304 | UPR 422 | Released; no voucher | 16-May-17 | <i>Aethomys ineptus s.l.</i>         | Limpopo | M | Fe     | Neg        | Neg |
| UP 12305 | UPR 423 | TM50777              | 16-May-17 | <i>Lemniscomys rosalia</i>           | Limpopo | F | Fe/ Ki | Neg        | Neg |
| UP 12306 | UPR 424 | Released; no voucher | 16-May-17 | <i>Aethomys ineptus s.l.</i>         | Limpopo | M | Fe     | Neg        | Neg |
| UP 12307 | UPR 425 | TM50548              | 16-May-17 | <i>Gerbilliscus leucogaster</i>      | Limpopo | F | Fe/ Ki | Neg        | Neg |
| UP 12310 | UPR 427 | TM50778              | 17-May-17 | <i>Saccostomus campestris</i>        | Limpopo | M | Fe/ Ki | Neg        | Neg |
| UP 12311 | UPR 428 | TM50779              | 17-May-17 | <i>Mastomys natalensis s.l.</i>      | Limpopo | F | Fe/ Ki | Neg        | Neg |
| UP 12312 | UPR 429 | TM50780              | 17-May-17 | <i>Steatomys sp.</i>                 | Limpopo | M | Ki     | Neg        | Neg |
| UP 12313 | UPR 430 | TM50781              | 17-May-17 | <i>Mastomys natalensis s.l.</i>      | Limpopo | M | Fe/ Ki | Neg        | Neg |
| UP 12314 | UPR 431 | TM50782              | 17-May-17 | <i>Gerbilliscus leucogaster</i>      | Limpopo | F | Ki     | Neg        | Neg |
| UP 12315 | UPR 432 | TM50783              | 17-May-17 | <i>Mastomys natalensis s.l.</i>      | Limpopo | F | Fe/ Ki | Neg        | Neg |
| UP 12316 | UPR 433 | TM50784              | 17-May-17 | <i>Mastomys natalensis s.l.</i>      | Limpopo | F | Fe/ Ki | Neg        | Neg |
| UP 12317 | UPR 434 | TM50785              | 17-May-17 | <i>Mastomys natalensis s.l.</i>      | Limpopo | F | Ki     | Neg        | Neg |
| UP 12318 | UPR 435 | TM50786              | 17-May-17 | <i>Gerbilliscus leucogaster</i>      | Limpopo | M | Ki     | Neg        | Neg |
| UP 12319 | UPR 436 | TM50787              | 17-May-17 | <i>Micaelamys namaquensis</i>        | Limpopo | F | Fe/ Ki | Neg        | Neg |
| UP 12320 | UPR 437 | TM50788              | 17-May-17 | <i>Gerbilliscus leucogaster</i>      | Limpopo | F | Fe/ Ki | Neg        | Neg |
| UP 12321 | UPR 438 | TM50789              | 17-May-17 | <i>Aethomys/Micaelamys sp.</i>       | Limpopo | F | Ki     | Neg        | Neg |
| UP 12323 | UPR 440 | Released; no voucher | 17-May-17 | <i>Mastomys natalensis s.l.</i>      | Limpopo | F | Fe     | Neg        | Neg |
| UP 12327 | UPR 443 | TM50790              | 17-May-17 | <i>Gerbilliscus leucogaster</i>      | Limpopo | F | Ki     | Neg        | Neg |
| UP 12328 | UPR 444 | TM50791              | 17-May-17 | <i>Steatomys sp.</i>                 | Limpopo | F | Ki     | Neg        | Neg |
| UP 12329 | UPR 445 | TM50792              | 17-May-17 | <i>Mastomys natalensis s.l.</i>      | Limpopo | M | Ki     | Neg        | Neg |
| UP 12330 | UPR 446 | TM50793              | 17-May-17 | <i>Mastomys natalensis s.l.</i>      | Limpopo | F | Ki     | Neg        | Neg |
| UP 12331 | UPR 447 | Released; no voucher | 17-May-17 | <i>Mastomys natalensis s.l.</i>      | Limpopo | M | Fe     | Neg        | Neg |
| UP 12332 | UPR 448 | TM50794              | 17-May-17 | <i>Mastomys natalensis s.l.</i>      | Limpopo | M | Fe/ Ki | Neg        | Neg |
| UP 12337 | UPR 451 | NHCPHE_MA M-7        | 18-May-17 | <i>Steatomys sp.</i>                 | Limpopo | M | Fe/ Ki | Neg        | Neg |
| UP 12338 | UPR 452 | TM50795              | 18-May-17 | <i>Mastomys natalensis s.l.</i>      | Limpopo | M | Ki     | Neg        | Neg |

|          |         |                      |           |                                       |         |   |        |     |     |
|----------|---------|----------------------|-----------|---------------------------------------|---------|---|--------|-----|-----|
| UP 12339 | UPR 453 | TM50796              | 18-May-17 | <i>Steatomys sp.</i>                  | Limpopo | M | Ki     | Neg | Neg |
| UP 12340 | UPR 454 | TM50797              | 18-May-17 | <i>Steatomys sp.</i>                  | Limpopo | F | Ki     | Neg | Neg |
| UP 12341 | UPR 455 | TM50798              | 18-May-17 | <i>Steatomys sp.</i>                  | Limpopo | M | Ki     | Neg | Neg |
| UP 12342 | UPR 456 | TM50799              | 18-May-17 | <i>Steatomys sp.</i>                  | Limpopo | M | Ki     | Neg | Neg |
| UP 12343 | UPR 457 | TM50800              | 18-May-17 | <i>Aethomys ineptus s.l.</i>          | Limpopo | M | Ki     | Neg | Neg |
| UP 12344 | UPR 458 | TM50801              | 18-May-17 | <i>Mastomys natalensis s.l.</i>       | Limpopo | F | Fe/ Ki | Neg | Neg |
| UP 12345 | UPR 459 | TM50802              | 18-May-17 | <i>Mastomys natalensis s.l.</i>       | Limpopo | F | Ki     | Neg | Neg |
| UP 12346 | UPR 460 | TM50803              | 18-May-17 | <i>Saccostomus campestris</i>         | Limpopo | F | Fe/ Ki | Neg | Neg |
| UP 12347 | UPR 461 | TM50804              | 18-May-17 | <i>Lemniscomys rosalia</i>            | Limpopo | F | Ki     | Neg | Neg |
| UP 12348 | UPR 462 | TM50805              | 18-May-17 | <i>Mastomys natalensis s.l.</i>       | Limpopo | F | Fe/ Ki | Neg | Neg |
| UP 12350 | UPR 464 | Released; no voucher | 18-May-17 | <i>Gerbilliscus leucogaster</i>       | Limpopo | M | Fe     | Neg | Neg |
| UP 12351 | UPR 465 | Released; no voucher | 18-May-17 | <i>Mastomys natalensis s.l.</i>       | Limpopo | M | Fe     | Neg | Neg |
| UP 12354 | UPR 468 | Released; no voucher | 18-May-17 | <i>Gerbilliscus leucogaster</i>       | Limpopo | F | Fe     | Neg | Neg |
| UP 12356 | UPR 470 | Released; no voucher | 18-May-17 | <i>Aethomys ineptus s.l.</i>          | Limpopo | F | Fe     | Neg | Neg |
| UP 12358 | UPR 472 | Released; no voucher | 18-May-17 | <i>Mastomys natalensis s.l.</i>       | Limpopo | F | Fe     | Neg | Neg |
| UP 12360 | UPR 474 | Released; no voucher | 18-May-17 | <i>Mastomys natalensis s.l.</i>       | Limpopo | F | Fe     | Neg | Neg |
| UP 12361 | UPR 475 | Released; no voucher | 18-May-17 | <i>Mastomys natalensis s.l.</i>       | Limpopo | F | Fe     | Neg | Neg |
| UP 12362 | UPR 476 | Released; no voucher | 18-May-17 | <i>Steatomys sp.</i>                  | Limpopo | M | Fe     | Neg | Neg |
| UP 12363 | UPR 477 | Released; no voucher | 18-May-17 | <i>Steatomys sp.</i>                  | Limpopo | M | Fe     | Neg | Neg |
| UP 12365 | UPR 478 | Released; no voucher | 18-May-17 | <i>Aethomys ineptus s.l.</i>          | Limpopo | F | Fe     | Neg | Neg |
| UP 12366 | UPR 479 | TM50806              | 18-May-17 | <i>Mus (Nannomys) sp.</i>             | Limpopo | F | Ki     | Neg | Neg |
| UP 12367 | UPR 480 | TM50807              | 18-May-17 | <i>Mastomys natalensis s.l.</i>       | Limpopo | M | Ki     | Neg | Neg |
| UP 12368 | UPR 481 | TM50808              | 19-May-17 | <i>Gerbilliscus leucogaster</i>       | Limpopo | M | Fe/ Ki | Neg | Neg |
| UP 12369 | UPR 482 | NHCPHE_MA M-8        | 19-May-17 | <i>Steatomys sp.</i>                  | Limpopo | M | Ki     | Neg | Neg |
| UP 12370 | UPR 483 | TM50809              | 19-May-17 | <i>Steatomys sp.</i>                  | Limpopo | M | Ki     | Neg | Neg |
| UP 12371 | UPR 484 | TM50810              | 19-May-17 | <i>Mastomys natalensis s.l.</i>       | Limpopo | M | Ki     | Neg | Neg |
| UP 12373 | UPR 486 | Released; no voucher | 18-May-17 | <i>Gerbilliscus leucogaster</i>       | Limpopo | M | Fe     | Neg | Neg |
| UP 12376 | UPR 489 | TM50716              | 18-May-17 | <i>Mastomys natalensis s.l.</i>       | Limpopo | M | Fe/ Ki | Neg | Neg |
| UP 12377 | UPR 490 | NHCPHE_MA M-9        | 19-May-17 | <i>Mus (Nannomys) minutoides s.l.</i> | Limpopo | M | Fe/ Ki | Neg | Neg |
| UP 12378 | UPR 491 | TM50811              | 18-May-17 | <i>Steatomys sp.</i>                  | Limpopo | F | Fe/ Ki | Neg | Neg |
| UP 12379 | UPR 492 | Released; no voucher | 19-May-17 | <i>Mastomys natalensis s.l.</i>       | Limpopo | M | Fe     | Neg | Neg |
| UP 12380 | UPR 493 | NHCPHE_MA M-10       | 19-May-17 | <i>Aethomys ineptus</i>               | Limpopo | M | Ki     | Neg | Neg |
| UP 12381 | UPR 494 | TM50812              | 19-May-17 | <i>Mastomys natalensis s.l.</i>       | Limpopo | F | Fe/ Ki | Neg | Neg |
| UP 12382 | UPR 495 | Released; no voucher | 19-May-17 | <i>Mastomys natalensis s.l.</i>       | Limpopo | M | Fe     | Neg | Neg |
| UP 12384 | UPR 497 | Released; no voucher | 19-May-17 | <i>Mus (Nannomys) sp.</i>             | Limpopo | M | Fe     | Neg | Neg |
| UP 12384 | UPR 500 | TM50813              | 19-May-17 | <i>Aethomys ineptus s.l.</i>          | Limpopo | F | Ki     | Neg | Neg |
| UP 12393 | UPR 506 | Released; no voucher | 29-Aug-17 | <i>Mastomys natalensis s.l.</i>       | Limpopo | M | Fe     | Neg | Neg |

|          |         |                      |           |                                    |         |   |        |     |     |
|----------|---------|----------------------|-----------|------------------------------------|---------|---|--------|-----|-----|
| UP 12394 | UPR 507 | TM50814              | 29-Aug-17 | <i>Mastomys natalensis s.l.</i>    | Limpopo | M | Fe/ Ki | Neg | Neg |
| UP 12395 | UPR 508 | TM50815              | 29-Aug-17 | <i>Mastomys natalensis s.l.</i>    | Limpopo | M | Fe/ Ki | Neg | Neg |
| UP 12396 | UPR 509 | Released; no voucher | 29-Aug-17 | <i>Mastomys natalensis s.l.</i>    | Limpopo | M | Fe     | Neg | Neg |
| UP 12397 | UPR 510 | Released; no voucher | 29-Aug-17 | <i>Mastomys natalensis s.l.</i>    | Limpopo | M | Fe     | Neg | Neg |
| UP 12398 | UPR 511 | Released; no voucher | 29-Aug-17 | <i>Mus (Nannomys) sp.</i>          | Limpopo | M | Fe     | Neg | Neg |
| UP 12399 | UPR 512 | Released; no voucher | 29-Aug-17 | <i>Mastomys natalensis s.l.</i>    | Limpopo | M | Fe     | Neg | Neg |
| UP 12400 | UPR 513 | Released; no voucher | 29-Aug-17 | <i>Mastomys natalensis s.l.</i>    | Limpopo | M | Fe     | Neg | Neg |
| UP 12403 | UPR 514 | Released; no voucher | 29-Aug-17 | <i>Mastomys natalensis s.l.</i>    | Limpopo | M | Fe     | Neg | Neg |
| UP 12404 | UPR 515 | Released; no voucher | 29-Aug-17 | <i>Mastomys natalensis s.l.</i>    | Limpopo | F | Fe     | Neg | Neg |
| UP 12405 | UPR 516 | Released; no voucher | 29-Aug-17 | <i>Aethomys ineptus s.l.</i>       | Limpopo | M | Fe     | Neg | Neg |
| UP 12406 | UPR 517 | Released; no voucher | 29-Aug-17 | <i>Aethomys ineptus s.l.</i>       | Limpopo | M | Fe     | Neg | Neg |
| UP 12409 | UPR 518 | Released; no voucher | 29-Aug-17 | <i>Aethomys ineptus s.l.</i>       | Limpopo | M | Fe     | Neg | Neg |
| UP 12410 | UPR 519 | Released; no voucher | 29-Aug-17 | <i>Mastomys natalensis s.l.</i>    | Limpopo | M | Fe     | Neg | Neg |
| UP 12414 | UPR 521 | TM50816              | 29-Aug-17 | <i>Elephantulus brachyrhynchus</i> | Limpopo | F | Fe/ Ki | Neg | Neg |
| UP 12415 | UPR 522 | TM50817              | 29-Aug-17 | <i>Mastomys natalensis s.l.</i>    | Limpopo | F | Ki     | Neg | Neg |
| UP 12416 | UPR 523 | TM50818              | 29-Aug-17 | <i>Mastomys natalensis s.l.</i>    | Limpopo | F | Ki     | Neg | Neg |
| UP 12417 | UPR 524 | TM50819              | 29-Aug-17 | <i>Mastomys natalensis s.l.</i>    | Limpopo | M | Fe/ Ki | Neg | Neg |
| UP 12418 | UPR 525 | NHCPHE_MAM-13        | 29-Aug-17 | <i>Mastomys natalensis s.l.</i>    | Limpopo | F | Fe/ Ki | Neg | Neg |
| UP 12419 | UPR 526 | TM50820              | 29-Aug-17 | <i>Mus (Nannomys) sp.</i>          | Limpopo | M | Ki     | Neg | Neg |
| UP 12420 | UPR 527 | TM50821              | 29-Aug-17 | <i>Mastomys natalensis s.l.</i>    | Limpopo | M | Fe/ Ki | Neg | Neg |
| UP 12421 | UPR 528 | TM50822              | 29-Aug-17 | <i>Mus (Nannomys) sp.</i>          | Limpopo | F | Ki     | Neg | Neg |
| UP 12422 | UPR 529 | Released; no voucher | 29-Aug-17 | <i>Aethomys ineptus s.l.</i>       | Limpopo | M | Fe     | Neg | Neg |
| UP 12423 | UPR 530 | Released; no voucher | 29-Aug-17 | <i>Aethomys sp.</i>                | Limpopo | M | Fe     | Neg | Neg |
| UP 12425 | UPR 531 | Released; no voucher | 29-Aug-17 | <i>Mastomys natalensis s.l.</i>    | Limpopo | M | Fe     | Neg | Neg |
| UP 12426 | UPR 532 | Released; no voucher | 29-Aug-17 | <i>Gerbilliscus leucogaster</i>    | Limpopo | M | Fe     | Neg | Neg |
| UP 12428 | UPR 533 | NHCPHE_MAM-11        | 29-Aug-17 | <i>Lemniscomys rosalia</i>         | Limpopo | M | Fe/ Ki | Neg | Neg |
| UP 12429 | UPR 534 | Released; no voucher | 29-Aug-17 | <i>Mastomys natalensis s.l.</i>    | Limpopo | M | Fe     | Neg | Neg |
| UP 12430 | UPR 535 | Released; no voucher | 29-Aug-17 | <i>Gerbilliscus leucogaster</i>    | Limpopo | M | Fe     | Neg | Neg |
| UP 12434 | UPR 537 | TM50823              | 29-Aug-17 | <i>Aethomys ineptus s.l.</i>       | Limpopo | F | Fe/ Ki | Neg | Neg |
| UP 12435 | UPR 538 | NHCPHE_MAM-15        | 29-Aug-17 | <i>Aethomys ineptus</i>            | Limpopo | M | Fe/ Ki | Neg | Neg |
| UP 12436 | UPR 539 | Released; no voucher | 29-Aug-17 | <i>Aethomys ineptus s.l.</i>       | Limpopo | M | Fe     | Neg | Neg |
| UP 12437 | UPR 540 | Released; no voucher | 29-Aug-17 | <i>Saccostomus campestris</i>      | Limpopo | M | Fe     | Neg | Neg |
| UP 12438 | UPR 541 | Released; no voucher | 29-Aug-17 | <i>Micaelamys namaquensis</i>      | Limpopo | M | Fe     | Neg | Neg |
| UP 12440 | UPR 542 | Released; no voucher | 29-Aug-17 | <i>Aethomys ineptus s.l.</i>       | Limpopo | M | Fe     | Neg | Neg |

|          |         |                      |           |                                 |         |   |        |            |     |
|----------|---------|----------------------|-----------|---------------------------------|---------|---|--------|------------|-----|
| UP 12442 | UPR 543 | TM50824              | 29-Aug-17 | <i>Aethomys ineptus s.l.</i>    | Limpopo | M | Fe/ Ki | Neg        | Neg |
| UP 12443 | UPR 544 | TM50825              | 29-Aug-17 | <i>Lemniscomys rosalia</i>      | Limpopo | F | Fe/ Ki | Neg        | Neg |
| UP 12444 | UPR 545 | TM50826              | 30-Aug-17 | <i>Mastomys natalensis s.l.</i> | Limpopo | M | Ki     | Neg        | Neg |
| UP 12445 | UPR 546 | TM50827              | 30-Aug-17 | <i>Mastomys natalensis s.l.</i> | Limpopo | F | Ki     | Neg        | Neg |
| UP 12446 | UPR 547 | Released; no voucher | 30-Aug-17 | <i>Gerbilliscus leucogaster</i> | Limpopo | M | Fe     | Neg        | Neg |
| UP 12447 | UPR 548 | TM50828              | 30-Aug-17 | <i>Micaelamys namaquensis</i>   | Limpopo | F | Ki     | Neg        | Neg |
| UP 12448 | UPR 549 | Released; no voucher | 30-Aug-17 | <i>Gerbilliscus leucogaster</i> | Limpopo | F | Fe     | Neg        | Neg |
| UP 12449 | UPR 550 | Released; no voucher | 30-Aug-17 | <i>Aethomys ineptus s.l.</i>    | Limpopo | F | Fe     | Neg        | Neg |
| UP 12450 | UPR 551 | Released; no voucher | 30-Aug-17 | <i>Mastomys natalensis s.l.</i> | Limpopo | M | Fe     | Neg        | Neg |
| UP 12452 | UPR 552 | Released; no voucher | 30-Aug-17 | <i>Aethomys ineptus s.l.</i>    | Limpopo | M | Fe     | Neg        | Neg |
| UP 12453 | UPR 553 | Released; no voucher | 30-Aug-17 | <i>Aethomys ineptus s.l.</i>    | Limpopo | M | Fe/ Ki | Neg        | Neg |
| UP 12454 | UPR 554 | Released; no voucher | 30-Aug-17 | <i>Mus (Nannomys) sp.</i>       | Limpopo | - | Fe     | Neg        | Neg |
| UP 12455 | UPR 555 | Released; no voucher | 30-Aug-17 | <i>Mus (Nannomys) sp.</i>       | Limpopo | F | Fe     | Neg        | Neg |
| UP 12456 | UPR 556 | Released; no voucher | 30-Aug-17 | <i>Gerbilliscus leucogaster</i> | Limpopo | M | Fe     | Neg        | Neg |
| UP 12458 | UPR 557 | TM50829              | 30-Aug-17 | <i>Mastomys natalensis s.l.</i> | Limpopo | F | Fe/ Ki | Neg        | Neg |
| UP 12459 | UPR 558 | Released; no voucher | 30-Aug-17 | <i>Mastomys natalensis s.l.</i> | Limpopo | M | Fe     | Neg        | Neg |
| UP 12460 | UPR 559 | Released; no voucher | 30-Aug-17 | <i>Mastomys natalensis s.l.</i> | Limpopo | M | Fe     | Neg        | Neg |
| UP 12461 | UPR 560 | Released; no voucher | 30-Aug-17 | <i>Mus (Nannomys) sp.</i>       | Limpopo | F | Fe     | Neg        | Neg |
| UP 12462 | UPR 561 | Released; no voucher | 30-Aug-17 | <i>Mus (Nannomys) sp.</i>       | Limpopo | F | Fe     | Neg        | Neg |
| UP 12463 | UPR 562 | Released; no voucher | 30-Aug-17 | <i>Mus (Nannomys) sp.</i>       | Limpopo | M | Fe     | Neg        | Neg |
| UP 12464 | UPR 563 | Released; no voucher | 30-Aug-17 | <i>Mastomys natalensis s.l.</i> | Limpopo | M | Fe     | Neg        | Neg |
| UP 12467 | UPR 565 | Released; no voucher | 30-Aug-17 | <i>Micaelamys namaquensis</i>   | Meletse | M | Fe     | Neg        | Neg |
| UP 12468 | UPR 566 | Released; no voucher | 30-Aug-17 | <i>Aethomys ineptus s.l.</i>    | Meletse | M | Fe     | Neg        | Neg |
| UP 12470 | UPR 568 | TM50830              | 31-Aug-17 | <i>Mus (Nannomys) sp.</i>       | Limpopo | F | Ki     | Neg        | Neg |
| UP 12471 | UPR 569 | TM50831              | 31-Aug-17 | <i>Mastomys natalensis s.l.</i> | Limpopo | M | Ki     | Neg        | Neg |
| UP 12472 | UPR 570 | NHCPHE_MAM-2         | 31-Aug-17 | <i>Mus (Nannomys) sp.</i>       | Limpopo | F | Fe/ Ki | <b>Pos</b> | Neg |
| UP 12473 | UPR 571 | TM50832              | 31-Aug-17 | <i>Mus (Nannomys) sp.</i>       | Limpopo | F | Ki     | Neg        | Neg |
| UP 12474 | UPR 572 | TM50833              | 31-Aug-17 | <i>Aethomys ineptus s.l.</i>    | Limpopo | F | Fe/ Ki | Neg        | Neg |
| UP 12475 | UPR 573 | TM50834              | 31-Aug-17 | <i>Lemniscomys rosalia</i>      | Limpopo | F | Fe/ Ki | Neg        | Neg |
| UP 12476 | UPR 574 | Released; no voucher | 31-Aug-17 | <i>Mastomys natalensis s.l.</i> | Limpopo | M | Fe     | Neg        | Neg |
| UP 12477 | UPR 575 | TM50835              | 31-Aug-17 | <i>Aethomys ineptus s.l.</i>    | Limpopo | F | Fe/ Ki | Neg        | Neg |
| UP 12478 | UPR 576 | Released; no voucher | 31-Aug-17 | <i>Mus (Nannomys) sp.</i>       | Limpopo | M | Fe     | Neg        | Neg |
| UP 12479 | UPR 577 | Released; no voucher | 31-Aug-17 | <i>Mus (Nannomys) sp.</i>       | Limpopo | F | Fe     | Neg        | Neg |
| UP 12480 | UPR 578 | Released; no voucher | 31-Aug-17 | <i>Mastomys natalensis s.l.</i> | Limpopo | M | Fe     | Neg        | Neg |
| UP 12481 | UPR 579 | Released; no voucher | 31-Aug-17 | <i>Mastomys natalensis s.l.</i> | Limpopo | M | Fe     | Neg        | Neg |

|          |         |                      |           |                                  |         |   |    |     |     |
|----------|---------|----------------------|-----------|----------------------------------|---------|---|----|-----|-----|
| UP 12482 | UPR 580 | Released; no voucher | 31-Aug-17 | <i>Mastomys natalensis s.l.</i>  | Limpopo | M | Fe | Neg | Neg |
| UP 12483 | UPR 581 | Released; no voucher | 31-Aug-17 | <i>Mus (Nannomys) sp.</i>        | Limpopo | F | Fe | Neg | Neg |
| UP 12484 | UPR 582 | Released; no voucher | 31-Aug-17 | <i>Gerbilliscus leucogaster</i>  | Limpopo | M | Fe | Neg | Neg |
| UP 12485 | UPR 583 | Released; no voucher | 31-Aug-17 | <i>Mus (Nannomys) sp.</i>        | Limpopo | M | Fe | Neg | Neg |
| UP 12486 | UPR 584 | Released; no voucher | 29-Aug-17 | <i>Aethomys ineptus s.l.</i>     | Limpopo | M | Fe | Neg | Neg |
| UP 12487 | UPR 585 | Released; no voucher | 29-Aug-17 | <i>Mus (Nannomys) sp.</i>        | Limpopo | M | Fe | Neg | Neg |
| UP 12488 | UPR 586 | Released; no voucher | 29-Aug-17 | <i>Gerbilliscus leucogaster</i>  | Limpopo | F | Fe | Neg | Neg |
| UP 12489 | UPR 587 | Released; no voucher | 29-Aug-17 | <i>Aethomys ineptus s.l.</i>     | Limpopo | F | Fe | Neg | Neg |
| UP 12490 | UPR 588 | Released; no voucher | 29-Aug-17 | <i>Mus (Nannomys) sp.</i>        | Limpopo | M | Fe | Neg | Neg |
| UP 12491 | UPR 589 | Released; no voucher | 29-Aug-17 | <i>Aethomys ineptus s.l.</i>     | Limpopo | M | Fe | Neg | Neg |
| UP 12492 | UPR 590 | Released; no voucher | 29-Aug-17 | <i>Aethomys ineptus s.l.</i>     | Limpopo | F | Fe | Neg | Neg |
| UP 12493 | UPR 591 | Released; no voucher | 30-Aug-17 | <i>Gerbilliscus leucogaster</i>  | Limpopo | M | Fe | Neg | Neg |
| UP 12494 | UPR 592 | Released; no voucher | 30-Aug-17 | <i>Gerbilliscus leucogaster</i>  | Limpopo | M | Fe | Neg | Neg |
| UP 12495 | UPR 593 | Released; no voucher | 30-Aug-17 | <i>Gerbilliscus leucogaster</i>  | Limpopo | M | Fe | Neg | Neg |
| UP 12496 | UPR 594 | Released; no voucher | 30-Aug-17 | <i>Gerbilliscus leucogaster</i>  | Limpopo | M | Fe | Neg | Neg |
| UP 12497 | UPR 595 | Released; no voucher | 30-Aug-17 | <i>Aethomys ineptus s.l.</i>     | Limpopo | M | Fe | Neg | Neg |
| UP 12498 | UPR 596 | Released; no voucher | 30-Aug-17 | <i>Gerbilliscus leucogaster</i>  | Limpopo | F | Fe | Neg | Neg |
| UP 12499 | UPR 597 | Released; no voucher | 30-Aug-17 | <i>Gerbilliscus leucogaster</i>  | Limpopo | F | Fe | Neg | Neg |
| UP 12500 | UPR 598 | Released; no voucher | 30-Aug-17 | <i>Gerbilliscus leucogaster</i>  | Limpopo | M | Fe | Neg | Neg |
| UP 12501 | UPR 599 | Released; no voucher | 30-Aug-17 | <i>Aethomys ineptus s.l.</i>     | Limpopo | F | Fe | Neg | Neg |
| UP 12502 | UPR 600 | Released; no voucher | 30-Aug-17 | <i>Gerbilliscus leucogaster</i>  | Limpopo | F | Fe | Neg | Neg |
| UP 12503 | UPR 601 | Released; no voucher | 31-Aug-17 | <i>Aethomys ineptus s.l.</i>     | Limpopo | M | Fe | Neg | Neg |
| UP 12504 | UPR 602 | Released; no voucher | 31-Aug-17 | <i>Gerbilliscus leucogaster</i>  | Limpopo | M | Fe | Neg | Neg |
| UP 12505 | UPR 603 | Released; no voucher | 31-Aug-17 | <i>Aethomys ineptus s.l.</i>     | Limpopo | M | Fe | Neg | Neg |
| UP 12507 | UPR 605 | Released; no voucher | 31-Aug-17 | <i>Aethomys ineptus s.l.</i>     | Limpopo | M | Fe | Neg | Neg |
| UP 12508 | UPR 606 | Released; no voucher | 31-Aug-17 | <i>Gerbilliscus leucogaster</i>  | Limpopo | F | Fe | Neg | Neg |
| UP 12510 | UPR 608 | Released; no voucher | 31-Aug-17 | <i>Gerbilliscus leucogaster.</i> | Limpopo | F | Fe | Neg | Neg |
| UP 12511 | UPR 609 | Released; no voucher | 31-Aug-17 | <i>Gerbilliscus leucogaster</i>  | Limpopo | F | Fe | Neg | Neg |
| UP 12512 | UPR 610 | Released; no voucher | 31-Aug-17 | <i>Gerbilliscus leucogaster</i>  | Limpopo | F | Fe | Neg | Neg |
| UP 12513 | UPR 611 | Released; no voucher | 31-Aug-17 | <i>Aethomys ineptus s.l.</i>     | Limpopo | F | Fe | Neg | Neg |
| UP 12514 | UPR 612 | Released; no voucher | 31-Aug-17 | <i>Gerbilliscus leucogaster</i>  | Limpopo | F | Fe | Neg | Neg |



|          |         |                      |           |                                 |         |   |        |     |     |
|----------|---------|----------------------|-----------|---------------------------------|---------|---|--------|-----|-----|
| UP 12515 | UPR 613 | Released; no voucher | 21-Nov-17 | <i>Mastomys natalensis s.l.</i> | Limpopo | F | Fe     | Neg | Neg |
| UP 12516 | UPR 614 | TM50836              | 21-Nov-17 | <i>Lemniscomys rosalia</i>      | Limpopo | F | Fe/ Ki | Neg | Neg |
| UP 12517 | UPR 615 | NHCPHE_MA M-25       | 21-Nov-17 | <i>Gerbilliscus leucogaster</i> | Limpopo | M | Fe/ Ki | Neg | Neg |
| UP 12518 | UPR 616 | NHCPHE_MA M-26       | 21-Nov-17 | <i>Gerbilliscus leucogaster</i> | Limpopo | M | Ki     | Neg | Neg |
| UP 12519 | UPR 617 | TM50837              | 21-Nov-17 | <i>Mastomys natalensis s.l.</i> | Limpopo | F | Ki     | Neg | Neg |
| UP 12520 | UPR 618 | TM50838              | 21-Nov-17 | <i>Lemniscomys rosalia</i>      | Limpopo | M | Fe/ Ki | Neg | Neg |
| UP 12521 | UPR 619 | Released; no voucher | 21-Nov-17 | <i>Mastomys natalensis s.l.</i> | Limpopo | M | Fe     | Neg | Neg |
| UP 12522 | UPR 620 | Released; no voucher | 21-Nov-17 | <i>Aethomys ineptus s.l.</i>    | Limpopo | F | Fe     | Neg | Neg |
| UP 12523 | UPR 621 | Released; no voucher | 21-Nov-17 | <i>Gerbilliscus leucogaster</i> | Limpopo | F | Fe     | Neg | Neg |
| UP 12524 | UPR 622 | TM50549              | 21-Nov-17 | <i>Gerbilliscus leucogaster</i> | Limpopo | M | Fe/ Ki | Neg | Neg |
| UP 12525 | UPR 623 | Released; no voucher | 21-Nov-17 | <i>Mastomys natalensis s.l.</i> | Limpopo | F | Fe     | Neg | Neg |
| UP 12526 | UPR 624 | TM50550              | 21-Nov-17 | <i>Gerbilliscus leucogaster</i> | Limpopo | M | Fe     | Neg | Neg |
| UP 12527 | UPR 625 | Released; no voucher | 21-Nov-17 | <i>Gerbilliscus leucogaster</i> | Limpopo | M | Fe     | Neg | Neg |
| UP 12528 | UPR 626 | TM50839              | 21-Nov-17 | <i>Mus (Nannomys) sp.</i>       | Limpopo | M | Fe/ Ki | Neg | Neg |
| UP 12529 | UPR 627 | TM50840              | 21-Nov-17 | <i>Mus (Nannomys) sp.</i>       | Limpopo | M | Ki     | Neg | Neg |
| UP 12530 | UPR 628 | TM50841              | 21-Nov-17 | <i>Mus (Nannomys) sp.</i>       | Limpopo | F | Ki     | Neg | Neg |
| UP 12531 | UPR 629 | TM50842              | 21-Nov-17 | <i>Mus (Nannomys) sp.</i>       | Limpopo | M | Fe/ Ki | Neg | Neg |
| UP 12532 | UPR 630 | TM50843              | 21-Nov-17 | <i>Mus (Nannomys) sp.</i>       | Limpopo | F | Ki     | Neg | Neg |
| UP 12534 | UPR 632 | TM50844              | 22-Nov-17 | <i>Mus (Nannomys) sp.</i>       | Limpopo | M | Ki     | Neg | Neg |
| UP 12535 | UPR 633 | TM50845              | 22-Nov-17 | <i>Mus (Nannomys) sp.</i>       | Limpopo | - | Ki     | Neg | Neg |
| UP 12536 | UPR 634 | TM50846              | 22-Nov-17 | <i>Mastomys natalensis s.l.</i> | Limpopo | F | Fe/ Ki | Neg | Neg |
| UP 12537 | UPR 635 | Released; no voucher | 22-Nov-17 | <i>Mus (Nannomys) sp.</i>       | Limpopo | M | Fe     | Neg | Neg |
| UP 12538 | UPR 636 | TM50847              | 22-Nov-17 | <i>Lemniscomys rosalia</i>      | Limpopo | F | Fe/ Ki | Neg | Neg |
| UP 12539 | UPR 637 | Released; no voucher | 22-Nov-17 | <i>Gerbilliscus leucogaster</i> | Limpopo | M | Fe     | Neg | Neg |
| UP 12540 | UPR 638 | Released; no voucher | 22-Nov-17 | <i>Mastomys natalensis s.l.</i> | Limpopo | M | Fe     | Neg | Neg |
| UP 12541 | UPR 639 | Released; no voucher | 22-Nov-17 | <i>Gerbilliscus leucogaster</i> | Limpopo | M | Fe     | Neg | Neg |
| UP 12542 | UPR 640 | Released; no voucher | 22-Nov-17 | <i>Aethomys ineptus s.l.</i>    | Limpopo | F | Fe     | Neg | Neg |
| UP 12543 | UPR 641 | Released; no voucher | 22-Nov-17 | <i>Gerbilliscus leucogaster</i> | Limpopo | M | Fe     | Neg | Neg |
| UP 12544 | UPR 642 | Released; no voucher | 22-Nov-17 | <i>Gerbilliscus leucogaster</i> | Limpopo | M | Fe     | Neg | Neg |
| UP 12545 | UPR 643 | TM50848              | 23-Nov-17 | <i>Mus (Nannomys) sp.</i>       | Limpopo | - | Ki     | Neg | Neg |
| UP 12546 | UPR 644 | TM50849              | 23-Nov-17 | <i>Mus (Nannomys) sp.</i>       | Limpopo | F | Ki     | Neg | Neg |
| UP 12547 | UPR 645 | TM49277              | 23-Nov-17 | <i>Crociodura hirta</i>         | Limpopo | F | Fe/ Ki | Neg | Neg |
| UP 12548 | UPR 646 | Released; no voucher | 23-Nov-17 | <i>Mus (Nannomys) sp.</i>       | Limpopo | M | Fe     | Neg | Neg |
| UP 12549 | UPR 647 | TM50850              | 23-Nov-17 | <i>Mus (Nannomys) sp.</i>       | Limpopo | F | Fe/ Ki | Neg | Neg |
| UP 12550 | UPR 648 | Released; no voucher | 23-Nov-17 | <i>Mastomys natalensis s.l.</i> | Limpopo | M | Fe     | Neg | Neg |
| UP 12551 | UPR 649 | TM50851              | 23-Nov-17 | <i>Mastomys natalensis s.l.</i> | Limpopo | M | Fe/ Ki | Neg | Neg |
| UP 12552 | UPR 650 | NHCPHE_MA M-14       | 23-Nov-17 | <i>Aethomys ineptus</i>         | Limpopo | M | Fe/ Ki | Neg | Neg |

|          |         |                      |           |                                 |         |   |        |     |     |
|----------|---------|----------------------|-----------|---------------------------------|---------|---|--------|-----|-----|
| UP 12553 | UPR 651 | Released; no voucher | 23-Nov-17 | <i>Gerbilliscus leucogaster</i> | Limpopo | M | Fe     | Neg | Neg |
| UP 12554 | UPR 652 | Released; no voucher | 23-Nov-17 | <i>Gerbilliscus leucogaster</i> | Limpopo | F | Fe     | Neg | Neg |
| UP 12555 | UPR 653 | Released; no voucher | 23-Nov-17 | <i>Aethomys ineptus s.l.</i>    | Limpopo | M | Fe     | Neg | Neg |
| UP 12556 | UPR 654 | TM50852              | 23-Nov-17 | <i>Aethomys/Micaelamys sp.</i>  | Limpopo | F | Fe/ Ki | Neg | Neg |
| UP 12557 | UPR 655 | TM50853              | 23-Nov-17 | <i>Mus (Nannomys) sp.</i>       | Limpopo | F | Ki     | Neg | Neg |
| UP 12558 | UPR 656 | TM50715              | 23-Nov-17 | <i>Saccostomus campestris</i>   | Limpopo | F | Fe/ Ki | Neg | Neg |
| UP 12559 | UPR 657 | TM50854              | 24-Nov-17 | <i>Mus (Nannomys) sp.</i>       | Limpopo | - | Ki     | Neg | Neg |
| UP 12560 | UPR 658 | TM50855              | 24-Nov-17 | <i>Mastomys natalensis s.l.</i> | Limpopo | M | Ki     | Neg | Neg |
| UP 12561 | UPR 659 | Released; no voucher | 24-Nov-17 | <i>Aethomys ineptus s.l.</i>    | Limpopo | M | Fe     | Neg | Neg |
| UP 12562 | UPR 660 | TM50856              | 24-Nov-17 | <i>Mus (Nannomys) sp.</i>       | Limpopo | M | Fe/ Ki | Neg | Neg |
| UP 12563 | UPR 661 | TM50857              | 24-Nov-17 | <i>Mastomys natalensis s.l.</i> | Limpopo | F | Fe/ Ki | Neg | Neg |

Table S2 Primers used in this study:

| Primer name                | Sequence 5-3                        | Primer use                  | Reference               |
|----------------------------|-------------------------------------|-----------------------------|-------------------------|
| CytB For                   | CGA AGC TTG ATA TGA AAA CCA ATC GTT | Cytochrome B barcoding      | Greenberg et al. (2012) |
| CytB rev                   | TGT AGT TRT CWG GGT CHT CTA         | Cytochrome B barcoding      | Greenberg et al. (2012) |
| LVL 3359 A-plus primer     | AGAATTAGTGAAAGGGAGAGCAATTC          | Arenavirus surveillance     | Vieth et al. (2007)     |
| LVL 3359 D-plus primer     | AGAATCAGTGAAAGGGAAAAGCAATTC         | Arenavirus surveillance     | Vieth et al. (2007)     |
| LVL 3359 G-plus primer     | AGAATTAGTGAAAGGGAGAGTAACTC          | Arenavirus surveillance     | Vieth et al. (2007)     |
| LVL 3754 A-minus primer    | CACATCATTGGTCCCCATTTACTATGATC       | Arenavirus surveillance     | Vieth et al. (2007)     |
| LVL 3754 D-minus primer    | CACATCATTGGTCCCCATTTACTGTGATC       | Arenavirus surveillance     | Vieth et al. (2007)     |
| HAN-L-F1                   | ATGTAYGTIAGTGCWGATGC                | Hantavirus surveillance     | Klempa et al. (2006)    |
| HAN-L-R1                   | AACATTSYTTCCACATITC                 | Hantavirus surveillance     | Klempa et al. (2006)    |
| HAN-L-F2                   | TGCWGATGCIACIAARTGGTC               | Hantavirus surveillance     | Klempa et al. (2006)    |
| HAN-L-R2                   | CRTCRCWGWARTGRTGDGCAA               | Hantavirus surveillance     | Klempa et al. (2006)    |
| LV-SJ 1-plus               | GCACCGGGGATCCTAGGCATTTTGGTTGC       | Characterization            | Günther et al., (2000)  |
| LV-SJ 3402-minus           | CGCACAGTGGATCCTAGGC                 | Characterization            | Günther et al., (2000)  |
| LVL1-plus                  | CGCACCGAGGATCCTAGGCATT              | Characterization            | Günther et al., (2000)  |
| LVL7279-minus              | CGCACCGGGGATCCTAGGCAAT              | Characterization            | Günther et al., (2000)  |
| S410_Rev1_PCRA (848)       | CGGAGCTGTCGCTTAGAGTCC               | Characterization validation | This study              |
| S410_Rev2_PCRA (805)       | CTCCTAGAGATGTAGATTGATTG             | Characterization validation | This study              |
| LV-SJ 1-plus_modified PCRA | GCACCGGGGATCCTAGGCAT                | Characterization validation | This study              |
| S410_For1_PCRB (2160)      | GAGCATTTGGATCAAGAGAAGTC             | Characterization validation | This study              |
| S410_For2_PCRB (2202)      | GAAGCTGAGAGTAGGTTAAGCC              | Characterization validation | This study              |
| LV-SJ 3402-modified PCRB   | CGCACAGTGGATCCTAGGC                 | Characterization validation | This study              |
| L410_For1_PCRC (4661)      | AGTTAATTGACAGACTGCAACAGCGG          | Characterization validation | This study              |
| L410_Rev_PCRC (6032)       | CCCAGAGAGATACAAAGAAATGGC            | Characterization validation | This study              |
| L410_For2_PCRC (4741)      | TCACAACACTCTTATTACTAGCC             | Characterization validation | This study              |
| L410_For1_PCRD (6774)      | GGTATTATTGTAGCAAGTCTACC             | Characterization validation | This study              |
| L410_For2_PCRD (6807)      | GGGTAGAAGTGTGATGCCAATCG             | Characterization validation | This study              |
| LVL 7279-minus_PCRD        | CGCACCGGGGATCCTAGGCAAT              | Characterization validation | Günther et al., (2000)  |
| LVL1-plus_PCRE             | CGCACCGAGGATCCTAGGCATT              | Characterization validation | Günther et al., (2000)  |
| L410_Rev1_PCRE (409)       | GAGTTTGTCTGGAAGTGGAAAC              | Characterization validation | This study              |
| L410_Rev2_PCRE (379)       | GGGACATCTATCGCTCACTGTG              | Characterization validation | This study              |
| S570_For1_PCRF (3010)      | CCGTAGCTTGGGGTCTTTCCG               | Characterization validation | This study              |
| S570_For2_PCRF (2970)      | TGAGTTTCTCCAGATCCGTTGC              | Characterization validation | This study              |
| LV-SJ 3402-modified PCRF   | CGCACAGTGGATCCTAGGC                 | Characterization validation | This study              |
| LV-SJ 1-plus_modified PCRG | GCACCGGGGATCCTAGGCAT                | Characterization validation | This study              |
| S570_Rev1_PCRG (558)       | CCATTGAAATCACAGCTCACAGC             | Characterization validation | This study              |
| S570_Rev2_PCRG (517)       | CCTCACTGATAGATGCAGGTGTG             | Characterization validation | This study              |
| L570_For1_PCRI (6657)      | CAGTAGCTTGAATAGTGAATCACG            | Characterization validation | This study              |
| L570_For2_PCRI (6724)      | GTACATCGACCATCCACTATGG              | Characterization validation | This study              |

|                      |                          |                             |                        |
|----------------------|--------------------------|-----------------------------|------------------------|
| LVL 7279-minus PCR1  | CGCACCGGGGATCCTAGGCAAT   | Characterization validation | Günther et al., (2000) |
| LVL1-plus PCRJ       | CGCACCGAGGATCCTAGGCATT   | Characterization validation | Günther et al., (2000) |
| L570_Rev1_PCRJ (715) | GAGATGTAGATGTTGCTCTGACGC | Characterization validation | This study             |
| L570_Rev2_PCRJ (685) | CACCCAGCTGAAGAAAGATATCC  | Characterization validation | This study             |
